# Supplementary material for: An online survival predictor in glioma patients using machine learning based on WHO CNS5 data
Source: Front Neurol. 2023 May 19;14:1179761. doi: 10.3389/fneur.2023.1179761 (PMC10237015; doi:10.3389/fneur.2023.1179761)
Supplement: Supplementary file 3 [file Table_1.xlsx]

## Sheet: Sheet1
Supplementary Table 1. Original data of all patients.
ID	Sex	Age	WHO5_pathologic_diagnosis	Grade	fustat	futime(d)	ACVR1	ATRX	BCOR	BRAF	CDK4	CDK6	CDKN2A	CDKN2B	CIC	EGFR	FBXW7	FGFR1	FGFR2	FGFR3	FGFR4	FUBP1	H3F3A	HIST1H3B	HIST1H3C	IDH1	IDH2	KIT	KMT5B	KRAS	MAP2K1	MET	MYB	MYBL1	MYC	MYCN	NF1	NOTCH1	NRAS	NTRK2	NTRK3	PDGFRA	PEG3	PIK3CA	PIK3CB	PIK3R1	PPM1D	PTEN	PTPN11
2571753	M	22	Oligodendroglioma	2	Dead	242	Alteration	No alteration	No alteration	No alteration	No alteration	No alteration	No alteration	No alteration	No alteration	No alteration	No alteration	No alteration	No alteration	No alteration	No alteration	No alteration	No alteration	No alteration	No alteration	No alteration	No alteration	No alteration	No alteration	No alteration	No alteration	No alteration	No alteration	No alteration	No alteration	No alteration	No alteration	No alteration	No alteration	No alteration	No alteration	No alteration	No alteration	No alteration	No alteration	No alteration	No alteration	No alteration	No alteration
2258075	M	55	Glioblastoma	4	Dead	19	No alteration	No alteration	No alteration	Alteration	Alteration	Alteration	Alteration	Alteration	No alteration	Alteration	No alteration	Alteration	Alteration	Alteration	No alteration	No alteration	No alteration	No alteration	No alteration	No alteration	No alteration	Alteration	No alteration	No alteration	No alteration	Alteration	Alteration	Alteration	No alteration	Alteration	No alteration	No alteration	No alteration	Alteration	No alteration	Alteration	Alteration	Alteration	No alteration	No alteration	Alteration	Alteration	No alteration
2537276	M	56	Glioblastoma	4	Dead	29	No alteration	No alteration	No alteration	No alteration	Alteration	Alteration	Alteration	Alteration	Alteration	No alteration	No alteration	Alteration	Alteration	Alteration	No alteration	No alteration	No alteration	No alteration	No alteration	No alteration	No alteration	Alteration	No alteration	No alteration	No alteration	No alteration	Alteration	No alteration	No alteration	No alteration	Alteration	No alteration	No alteration	Alteration	Alteration	No alteration	No alteration	No alteration	No alteration	Alteration	No alteration	Alteration	No alteration
2007642	M	54	Glioblastoma	4	Dead	65	No alteration	No alteration	No alteration	Alteration	No alteration	Alteration	Alteration	Alteration	Alteration	Alteration	No alteration	No alteration	Alteration	No alteration	No alteration	No alteration	No alteration	No alteration	No alteration	No alteration	No alteration	No alteration	No alteration	No alteration	No alteration	Alteration	No alteration	No alteration	No alteration	No alteration	No alteration	No alteration	No alteration	No alteration	No alteration	No alteration	No alteration	No alteration	No alteration	No alteration	Alteration	Alteration	No alteration
5112662	M	73	Glioblastoma	4	Dead	87	No alteration	No alteration	No alteration	No alteration	Alteration	Alteration	Alteration	Alteration	Alteration	Alteration	No alteration	Alteration	Alteration	Alteration	Alteration	No alteration	No alteration	No alteration	No alteration	No alteration	No alteration	Alteration	No alteration	Alteration	No alteration	No alteration	Alteration	Alteration	Alteration	Alteration	No alteration	No alteration	No alteration	Alteration	Alteration	Alteration	No alteration	Alteration	No alteration	No alteration	Alteration	Alteration	Alteration
2081755	F	27	Glioblastoma	4	Dead	101	No alteration	No alteration	No alteration	Alteration	Alteration	Alteration	Alteration	Alteration	No alteration	No alteration	No alteration	No alteration	Alteration	No alteration	No alteration	No alteration	No alteration	No alteration	No alteration	No alteration	No alteration	No alteration	Alteration	Alteration	No alteration	No alteration	Alteration	No alteration	No alteration	No alteration	No alteration	No alteration	No alteration	No alteration	No alteration	No alteration	No alteration	Alteration	No alteration	No alteration	Alteration	No alteration	No alteration
1773249	M	55	Glioblastoma	4	Dead	111	No alteration	Alteration	No alteration	Alteration	No alteration	Alteration	Alteration	Alteration	No alteration	Alteration	No alteration	No alteration	No alteration	Alteration	Alteration	No alteration	No alteration	No alteration	No alteration	No alteration	No alteration	No alteration	No alteration	No alteration	No alteration	Alteration	No alteration	No alteration	No alteration	No alteration	No alteration	No alteration	No alteration	No alteration	No alteration	Alteration	Alteration	Alteration	No alteration	No alteration	Alteration	No alteration	No alteration
W189396	M	62	Glioblastoma	4	Dead	116	No alteration	No alteration	No alteration	Alteration	Alteration	Alteration	No alteration	No alteration	No alteration	Alteration	No alteration	No alteration	No alteration	No alteration	No alteration	No alteration	No alteration	No alteration	No alteration	No alteration	No alteration	No alteration	No alteration	Alteration	No alteration	Alteration	No alteration	No alteration	No alteration	Alteration	No alteration	Alteration	No alteration	No alteration	No alteration	No alteration	No alteration	Alteration	No alteration	No alteration	Alteration	No alteration	Alteration
1650613	M	57	Glioblastoma	4	Dead	126	No alteration	No alteration	No alteration	Alteration	No alteration	Alteration	No alteration	No alteration	No alteration	Alteration	No alteration	No alteration	No alteration	No alteration	No alteration	No alteration	No alteration	No alteration	No alteration	No alteration	No alteration	Alteration	Alteration	No alteration	No alteration	No alteration	No alteration	No alteration	No alteration	No alteration	No alteration	No alteration	No alteration	No alteration	No alteration	No alteration	No alteration	No alteration	No alteration	No alteration	Alteration	No alteration	No alteration
3102197	M	65	Glioblastoma	4	Dead	151	No alteration	No alteration	No alteration	No alteration	Alteration	Alteration	Alteration	Alteration	No alteration	Alteration	No alteration	No alteration	Alteration	No alteration	No alteration	No alteration	No alteration	No alteration	No alteration	No alteration	No alteration	No alteration	No alteration	Alteration	No alteration	Alteration	Alteration	Alteration	No alteration	No alteration	No alteration	No alteration	No alteration	No alteration	No alteration	No alteration	No alteration	No alteration	No alteration	No alteration	Alteration	No alteration	No alteration
2204603	M	50	Glioblastoma	4	Dead	153	No alteration	No alteration	No alteration	Alteration	No alteration	Alteration	No alteration	No alteration	No alteration	Alteration	No alteration	No alteration	Alteration	No alteration	No alteration	Alteration	No alteration	No alteration	No alteration	No alteration	No alteration	No alteration	No alteration	No alteration	No alteration	No alteration	No alteration	No alteration	No alteration	No alteration	No alteration	No alteration	No alteration	Alteration	No alteration	No alteration	No alteration	No alteration	No alteration	No alteration	Alteration	Alteration	No alteration
2578078	F	56	Paediatric-type diffuse gliomas	2	Dead	158	No alteration	No alteration	No alteration	No alteration	Alteration	No alteration	Alteration	Alteration	No alteration	Alteration	No alteration	Alteration	Alteration	No alteration	Alteration	No alteration	No alteration	No alteration	No alteration	No alteration	No alteration	Alteration	No alteration	Alteration	No alteration	No alteration	Alteration	Alteration	Alteration	Alteration	No alteration	Alteration	No alteration	Alteration	No alteration	Alteration	No alteration	No alteration	No alteration	No alteration	Alteration	Alteration	No alteration
1728937	M	65	Glioblastoma	4	Dead	165	No alteration	No alteration	No alteration	Alteration	Alteration	Alteration	Alteration	Alteration	No alteration	Alteration	No alteration	No alteration	Alteration	Alteration	No alteration	No alteration	No alteration	No alteration	No alteration	No alteration	No alteration	No alteration	No alteration	Alteration	No alteration	Alteration	No alteration	No alteration	No alteration	Alteration	No alteration	Alteration	No alteration	Alteration	No alteration	No alteration	Alteration	Alteration	No alteration	Alteration	Alteration	Alteration	No alteration
5111850	F	56	Glioblastoma	4	Dead	166	No alteration	No alteration	No alteration	Alteration	Alteration	Alteration	Alteration	Alteration	No alteration	Alteration	No alteration	Alteration	Alteration	No alteration	Alteration	No alteration	No alteration	No alteration	No alteration	No alteration	No alteration	Alteration	No alteration	Alteration	No alteration	Alteration	Alteration	Alteration	Alteration	No alteration	No alteration	No alteration	No alteration	Alteration	Alteration	Alteration	Alteration	Alteration	No alteration	No alteration	Alteration	Alteration	Alteration
2575091	F	72	Glioblastoma	4	Dead	175	No alteration	No alteration	No alteration	Alteration	Alteration	Alteration	Alteration	Alteration	No alteration	Alteration	No alteration	Alteration	Alteration	Alteration	No alteration	No alteration	No alteration	No alteration	No alteration	No alteration	No alteration	Alteration	No alteration	Alteration	No alteration	No alteration	Alteration	Alteration	Alteration	No alteration	No alteration	No alteration	No alteration	Alteration	Alteration	Alteration	Alteration	Alteration	No alteration	No alteration	Alteration	Alteration	Alteration
1655189	M	39	Glioblastoma	4	Dead	179	No alteration	No alteration	No alteration	Alteration	No alteration	Alteration	Alteration	Alteration	No alteration	Alteration	No alteration	Alteration	Alteration	No alteration	Alteration	No alteration	No alteration	No alteration	No alteration	No alteration	No alteration	No alteration	No alteration	No alteration	No alteration	Alteration	Alteration	Alteration	No alteration	No alteration	No alteration	Alteration	No alteration	No alteration	No alteration	No alteration	Alteration	No alteration	No alteration	No alteration	Alteration	Alteration	No alteration
2526646	F	66	Glioblastoma	4	Dead	189	No alteration	No alteration	No alteration	Alteration	Alteration	Alteration	Alteration	Alteration	No alteration	Alteration	No alteration	No alteration	Alteration	No alteration	Alteration	No alteration	No alteration	No alteration	No alteration	No alteration	No alteration	Alteration	Alteration	Alteration	No alteration	Alteration	Alteration	Alteration	No alteration	No alteration	Alteration	No alteration	No alteration	Alteration	Alteration	No alteration	Alteration	Alteration	No alteration	No alteration	Alteration	Alteration	No alteration
2574672	M	11	Glioneuronal and neuronal tumors	2	Dead	189	No alteration	No alteration	No alteration	Alteration	Alteration	Alteration	Alteration	Alteration	No alteration	Alteration	No alteration	Alteration	Alteration	No alteration	No alteration	No alteration	No alteration	No alteration	No alteration	No alteration	No alteration	No alteration	No alteration	Alteration	No alteration	No alteration	No alteration	Alteration	No alteration	Alteration	No alteration	No alteration	No alteration	No alteration	No alteration	Alteration	No alteration	No alteration	No alteration	No alteration	Alteration	Alteration	No alteration
2423402	M	59	Paediatric-type diffuse gliomas	4	Dead	209	No alteration	No alteration	No alteration	No alteration	No alteration	Alteration	Alteration	Alteration	No alteration	Alteration	No alteration	No alteration	No alteration	Alteration	No alteration	No alteration	No alteration	No alteration	No alteration	No alteration	No alteration	No alteration	No alteration	Alteration	No alteration	Alteration	No alteration	No alteration	No alteration	No alteration	No alteration	No alteration	No alteration	No alteration	No alteration	No alteration	No alteration	No alteration	No alteration	No alteration	Alteration	Alteration	No alteration
W214394	M	69	Glioneuronal and neuronal tumors	3	Dead	212	No alteration	No alteration	No alteration	No alteration	No alteration	Alteration	Alteration	Alteration	No alteration	Alteration	No alteration	No alteration	No alteration	No alteration	No alteration	No alteration	No alteration	No alteration	No alteration	No alteration	No alteration	No alteration	No alteration	No alteration	No alteration	No alteration	No alteration	No alteration	No alteration	No alteration	Alteration	No alteration	No alteration	Alteration	No alteration	No alteration	Alteration	Alteration	No alteration	No alteration	Alteration	Alteration	No alteration
2514352	M	66	Glioblastoma	4	Dead	217	No alteration	No alteration	No alteration	Alteration	Alteration	Alteration	Alteration	Alteration	No alteration	Alteration	No alteration	Alteration	Alteration	Alteration	Alteration	No alteration	No alteration	No alteration	No alteration	No alteration	No alteration	Alteration	No alteration	Alteration	No alteration	Alteration	Alteration	Alteration	No alteration	Alteration	Alteration	No alteration	No alteration	Alteration	Alteration	Alteration	Alteration	Alteration	No alteration	No alteration	Alteration	Alteration	Alteration
2268694	M	56	Glioblastoma	4	Dead	234	No alteration	No alteration	No alteration	No alteration	Alteration	Alteration	No alteration	Alteration	No alteration	Alteration	No alteration	No alteration	No alteration	No alteration	No alteration	No alteration	No alteration	No alteration	No alteration	No alteration	No alteration	No alteration	No alteration	Alteration	No alteration	Alteration	Alteration	Alteration	No alteration	No alteration	No alteration	No alteration	No alteration	No alteration	No alteration	Alteration	Alteration	Alteration	No alteration	No alteration	Alteration	Alteration	Alteration
2241581	M	54	Glioblastoma	4	Dead	248	No alteration	No alteration	No alteration	Alteration	Alteration	Alteration	Alteration	Alteration	No alteration	Alteration	No alteration	No alteration	No alteration	Alteration	No alteration	No alteration	No alteration	No alteration	No alteration	No alteration	No alteration	No alteration	No alteration	Alteration	No alteration	No alteration	No alteration	No alteration	No alteration	No alteration	No alteration	Alteration	No alteration	Alteration	No alteration	Alteration	Alteration	Alteration	Alteration	No alteration	Alteration	Alteration	No alteration
2260459	M	48	Glioblastoma	4	Dead	274	No alteration	No alteration	No alteration	No alteration	Alteration	Alteration	Alteration	Alteration	No alteration	Alteration	No alteration	No alteration	No alteration	Alteration	No alteration	No alteration	No alteration	No alteration	No alteration	No alteration	No alteration	No alteration	No alteration	No alteration	No alteration	Alteration	Alteration	No alteration	Alteration	No alteration	No alteration	Alteration	No alteration	Alteration	Alteration	No alteration	No alteration	Alteration	No alteration	No alteration	Alteration	No alteration	No alteration
2552963	M	29	Glioblastoma	4	Dead	300	No alteration	No alteration	No alteration	No alteration	Alteration	Alteration	Alteration	Alteration	Alteration	Alteration	No alteration	Alteration	Alteration	Alteration	Alteration	No alteration	No alteration	No alteration	No alteration	No alteration	No alteration	Alteration	No alteration	Alteration	No alteration	No alteration	Alteration	No alteration	Alteration	No alteration	No alteration	No alteration	No alteration	Alteration	Alteration	Alteration	Alteration	Alteration	No alteration	No alteration	Alteration	Alteration	No alteration
2056822	F	33	Circumscribed astrocytic gliomas	3	Dead	326	No alteration	No alteration	No alteration	No alteration	No alteration	No alteration	No alteration	No alteration	No alteration	Alteration	No alteration	Alteration	Alteration	No alteration	No alteration	No alteration	No alteration	No alteration	No alteration	No alteration	No alteration	No alteration	Alteration	No alteration	No alteration	No alteration	No alteration	Alteration	Alteration	No alteration	No alteration	No alteration	No alteration	No alteration	No alteration	No alteration	No alteration	Alteration	No alteration	No alteration	Alteration	Alteration	No alteration
2281812	M	48	Glioblastoma	4	Dead	330	No alteration	No alteration	No alteration	Alteration	Alteration	Alteration	Alteration	Alteration	No alteration	Alteration	No alteration	Alteration	Alteration	Alteration	Alteration	No alteration	No alteration	No alteration	No alteration	No alteration	No alteration	No alteration	No alteration	Alteration	No alteration	Alteration	Alteration	Alteration	No alteration	No alteration	No alteration	No alteration	No alteration	Alteration	Alteration	Alteration	Alteration	Alteration	No alteration	No alteration	Alteration	Alteration	No alteration
2209755	F	56	Glioblastoma	4	Dead	341	No alteration	No alteration	No alteration	No alteration	No alteration	Alteration	Alteration	Alteration	Alteration	Alteration	No alteration	No alteration	Alteration	No alteration	No alteration	No alteration	No alteration	No alteration	No alteration	No alteration	No alteration	No alteration	Alteration	No alteration	No alteration	Alteration	Alteration	Alteration	No alteration	No alteration	No alteration	Alteration	No alteration	Alteration	No alteration	No alteration	Alteration	No alteration	No alteration	No alteration	Alteration	Alteration	No alteration
2240957	F	48	Glioblastoma	4	Dead	343	No alteration	No alteration	No alteration	No alteration	No alteration	No alteration	Alteration	Alteration	No alteration	Alteration	No alteration	No alteration	Alteration	No alteration	No alteration	No alteration	No alteration	No alteration	No alteration	No alteration	No alteration	No alteration	No alteration	No alteration	No alteration	No alteration	Alteration	No alteration	No alteration	No alteration	No alteration	Alteration	No alteration	Alteration	No alteration	No alteration	No alteration	No alteration	No alteration	No alteration	Alteration	Alteration	No alteration
2288921	M	63	Glioneuronal and neuronal tumors	3	Dead	353	No alteration	No alteration	No alteration	No alteration	No alteration	Alteration	Alteration	Alteration	No alteration	Alteration	No alteration	No alteration	Alteration	No alteration	No alteration	No alteration	No alteration	No alteration	No alteration	No alteration	No alteration	No alteration	No alteration	No alteration	No alteration	Alteration	No alteration	No alteration	No alteration	No alteration	No alteration	No alteration	No alteration	No alteration	No alteration	No alteration	Alteration	Alteration	No alteration	No alteration	Alteration	Alteration	No alteration
2086505	M	74	Glioblastoma	4	Dead	357	No alteration	No alteration	No alteration	Alteration	No alteration	Alteration	Alteration	Alteration	No alteration	Alteration	No alteration	No alteration	No alteration	No alteration	No alteration	No alteration	No alteration	No alteration	No alteration	No alteration	No alteration	No alteration	No alteration	Alteration	No alteration	No alteration	No alteration	No alteration	No alteration	No alteration	No alteration	No alteration	No alteration	No alteration	No alteration	No alteration	No alteration	Alteration	No alteration	No alteration	Alteration	Alteration	No alteration
1618265	F	65	Glioblastoma	4	Dead	368	No alteration	No alteration	No alteration	Alteration	Alteration	Alteration	Alteration	Alteration	No alteration	Alteration	No alteration	No alteration	Alteration	Alteration	No alteration	No alteration	No alteration	No alteration	No alteration	No alteration	No alteration	No alteration	No alteration	No alteration	No alteration	Alteration	Alteration	No alteration	Alteration	Alteration	No alteration	Alteration	No alteration	Alteration	No alteration	Alteration	No alteration	No alteration	No alteration	No alteration	Alteration	Alteration	No alteration
2041466	M	47	Glioblastoma	4	Dead	378	No alteration	No alteration	No alteration	No alteration	No alteration	Alteration	Alteration	Alteration	No alteration	Alteration	No alteration	No alteration	Alteration	No alteration	No alteration	No alteration	No alteration	No alteration	No alteration	No alteration	No alteration	Alteration	Alteration	No alteration	No alteration	Alteration	No alteration	No alteration	No alteration	No alteration	No alteration	No alteration	No alteration	No alteration	No alteration	Alteration	No alteration	Alteration	No alteration	No alteration	Alteration	Alteration	No alteration
2065816	M	59	Astrocytoma	2	Dead	408	No alteration	No alteration	No alteration	Alteration	No alteration	No alteration	No alteration	No alteration	No alteration	No alteration	No alteration	No alteration	No alteration	No alteration	No alteration	No alteration	No alteration	No alteration	No alteration	Alteration	No alteration	No alteration	No alteration	No alteration	No alteration	No alteration	No alteration	No alteration	No alteration	No alteration	No alteration	Alteration	No alteration	No alteration	No alteration	No alteration	Alteration	No alteration	No alteration	No alteration	Alteration	No alteration	No alteration
2545626	M	56	Glioblastoma	4	Dead	419	No alteration	No alteration	No alteration	Alteration	No alteration	Alteration	Alteration	Alteration	No alteration	Alteration	No alteration	No alteration	Alteration	Alteration	No alteration	Alteration	No alteration	No alteration	No alteration	No alteration	No alteration	Alteration	Alteration	Alteration	No alteration	Alteration	Alteration	Alteration	No alteration	No alteration	No alteration	No alteration	No alteration	No alteration	Alteration	Alteration	Alteration	Alteration	No alteration	No alteration	Alteration	Alteration	No alteration
2228259	F	54	Astrocytoma	2	Dead	455	No alteration	Alteration	No alteration	No alteration	Alteration	No alteration	No alteration	No alteration	No alteration	No alteration	No alteration	No alteration	No alteration	No alteration	Alteration	No alteration	No alteration	No alteration	No alteration	Alteration	No alteration	Alteration	No alteration	No alteration	No alteration	No alteration	No alteration	No alteration	No alteration	No alteration	No alteration	No alteration	No alteration	No alteration	No alteration	Alteration	No alteration	Alteration	No alteration	No alteration	Alteration	No alteration	Alteration
W169260	F	69	Glioblastoma	4	Dead	456	No alteration	No alteration	No alteration	Alteration	No alteration	Alteration	Alteration	Alteration	No alteration	Alteration	No alteration	No alteration	Alteration	No alteration	No alteration	No alteration	No alteration	No alteration	No alteration	No alteration	No alteration	No alteration	No alteration	No alteration	No alteration	Alteration	Alteration	No alteration	No alteration	No alteration	No alteration	No alteration	No alteration	No alteration	No alteration	No alteration	No alteration	No alteration	No alteration	No alteration	Alteration	Alteration	No alteration
2531913	M	56	Glioblastoma	4	Dead	475	No alteration	No alteration	No alteration	Alteration	Alteration	Alteration	Alteration	Alteration	No alteration	Alteration	No alteration	No alteration	Alteration	Alteration	Alteration	No alteration	No alteration	No alteration	No alteration	No alteration	No alteration	Alteration	No alteration	Alteration	No alteration	Alteration	Alteration	Alteration	No alteration	Alteration	No alteration	No alteration	No alteration	Alteration	Alteration	Alteration	Alteration	Alteration	No alteration	No alteration	Alteration	Alteration	No alteration
1744923	M	41	Astrocytoma	4	Dead	477	No alteration	Alteration	Alteration	Alteration	Alteration	Alteration	Alteration	Alteration	No alteration	Alteration	No alteration	Alteration	Alteration	No alteration	No alteration	No alteration	No alteration	No alteration	No alteration	Alteration	No alteration	No alteration	No alteration	Alteration	No alteration	No alteration	No alteration	No alteration	No alteration	Alteration	No alteration	Alteration	No alteration	Alteration	No alteration	Alteration	Alteration	Alteration	No alteration	Alteration	Alteration	Alteration	Alteration
2010856	M	75	Glioblastoma	4	Dead	482	No alteration	No alteration	No alteration	No alteration	No alteration	No alteration	Alteration	Alteration	No alteration	Alteration	No alteration	No alteration	Alteration	No alteration	No alteration	No alteration	No alteration	No alteration	No alteration	No alteration	No alteration	No alteration	No alteration	No alteration	No alteration	No alteration	No alteration	No alteration	No alteration	No alteration	No alteration	No alteration	No alteration	No alteration	No alteration	Alteration	No alteration	No alteration	No alteration	No alteration	Alteration	No alteration	Alteration
2534477	M	47	Glioblastoma	4	Dead	498	No alteration	Alteration	No alteration	No alteration	Alteration	Alteration	Alteration	Alteration	Alteration	Alteration	No alteration	Alteration	Alteration	Alteration	Alteration	No alteration	No alteration	No alteration	No alteration	No alteration	No alteration	Alteration	No alteration	Alteration	No alteration	No alteration	Alteration	Alteration	Alteration	Alteration	Alteration	Alteration	No alteration	Alteration	Alteration	Alteration	Alteration	Alteration	Alteration	No alteration	Alteration	Alteration	Alteration
1600354	M	34	Astrocytoma	4	Dead	499	No alteration	Alteration	No alteration	Alteration	Alteration	Alteration	Alteration	Alteration	No alteration	Alteration	No alteration	No alteration	Alteration	No alteration	Alteration	No alteration	No alteration	No alteration	No alteration	Alteration	No alteration	No alteration	No alteration	Alteration	No alteration	No alteration	Alteration	No alteration	Alteration	Alteration	No alteration	Alteration	No alteration	Alteration	Alteration	Alteration	Alteration	Alteration	No alteration	No alteration	Alteration	Alteration	No alteration
2028162	M	29	Astrocytoma	4	Dead	505	No alteration	Alteration	No alteration	Alteration	Alteration	Alteration	Alteration	Alteration	No alteration	Alteration	Alteration	Alteration	Alteration	No alteration	Alteration	No alteration	No alteration	No alteration	No alteration	Alteration	No alteration	No alteration	No alteration	Alteration	No alteration	No alteration	No alteration	No alteration	Alteration	No alteration	No alteration	Alteration	No alteration	No alteration	No alteration	No alteration	No alteration	Alteration	No alteration	Alteration	No alteration	Alteration	No alteration
1528181	M	46	Oligodendroglioma	2	Dead	519	No alteration	No alteration	No alteration	No alteration	No alteration	No alteration	No alteration	No alteration	No alteration	No alteration	No alteration	Alteration	No alteration	No alteration	No alteration	Alteration	No alteration	No alteration	No alteration	Alteration	No alteration	No alteration	No alteration	No alteration	No alteration	No alteration	No alteration	No alteration	Alteration	No alteration	No alteration	Alteration	No alteration	No alteration	No alteration	No alteration	Alteration	No alteration	No alteration	No alteration	Alteration	No alteration	No alteration
2520484	M	73	Glioblastoma	4	Dead	524	No alteration	No alteration	No alteration	No alteration	Alteration	Alteration	Alteration	Alteration	No alteration	Alteration	No alteration	No alteration	Alteration	No alteration	No alteration	No alteration	No alteration	No alteration	No alteration	No alteration	No alteration	No alteration	No alteration	Alteration	No alteration	No alteration	Alteration	No alteration	No alteration	No alteration	No alteration	No alteration	No alteration	No alteration	No alteration	No alteration	Alteration	No alteration	No alteration	Alteration	No alteration	Alteration	No alteration
2541315	M	65	Glioblastoma	4	Dead	529	No alteration	No alteration	Alteration	Alteration	Alteration	Alteration	Alteration	Alteration	No alteration	Alteration	No alteration	Alteration	Alteration	Alteration	No alteration	No alteration	No alteration	No alteration	No alteration	No alteration	No alteration	Alteration	No alteration	Alteration	No alteration	No alteration	No alteration	Alteration	No alteration	No alteration	Alteration	No alteration	No alteration	Alteration	Alteration	Alteration	No alteration	Alteration	No alteration	No alteration	Alteration	Alteration	Alteration
2541585	M	30	Oligodendroglioma	3	Dead	529	No alteration	No alteration	No alteration	No alteration	No alteration	No alteration	No alteration	No alteration	Alteration	No alteration	No alteration	No alteration	No alteration	No alteration	No alteration	No alteration	No alteration	No alteration	No alteration	Alteration	No alteration	No alteration	No alteration	No alteration	No alteration	No alteration	No alteration	No alteration	No alteration	No alteration	No alteration	Alteration	No alteration	No alteration	No alteration	No alteration	Alteration	Alteration	No alteration	No alteration	Alteration	No alteration	No alteration
2540485	M	41	Astrocytoma	2	Dead	548	No alteration	Alteration	No alteration	No alteration	Alteration	Alteration	Alteration	No alteration	No alteration	No alteration	No alteration	Alteration	No alteration	Alteration	No alteration	No alteration	No alteration	No alteration	No alteration	Alteration	No alteration	Alteration	No alteration	No alteration	No alteration	No alteration	No alteration	No alteration	No alteration	No alteration	No alteration	Alteration	No alteration	Alteration	No alteration	No alteration	Alteration	No alteration	No alteration	No alteration	Alteration	No alteration	No alteration
2536392	M	65	Glioblastoma	4	Dead	553	No alteration	No alteration	No alteration	Alteration	Alteration	Alteration	Alteration	Alteration	No alteration	Alteration	No alteration	Alteration	Alteration	Alteration	No alteration	No alteration	No alteration	No alteration	No alteration	No alteration	No alteration	Alteration	No alteration	Alteration	No alteration	Alteration	Alteration	No alteration	Alteration	No alteration	No alteration	Alteration	No alteration	Alteration	Alteration	No alteration	Alteration	No alteration	No alteration	No alteration	Alteration	Alteration	Alteration
2027350	M	33	Astrocytoma	4	Dead	553	No alteration	No alteration	No alteration	No alteration	Alteration	Alteration	Alteration	Alteration	No alteration	Alteration	No alteration	No alteration	Alteration	No alteration	No alteration	No alteration	No alteration	No alteration	No alteration	Alteration	No alteration	Alteration	No alteration	No alteration	No alteration	No alteration	No alteration	Alteration	Alteration	No alteration	No alteration	No alteration	No alteration	No alteration	No alteration	Alteration	Alteration	Alteration	No alteration	No alteration	Alteration	Alteration	No alteration
2535392	M	74	Glioblastoma	4	Dead	590	No alteration	No alteration	No alteration	Alteration	Alteration	Alteration	Alteration	Alteration	No alteration	Alteration	No alteration	Alteration	Alteration	Alteration	Alteration	No alteration	No alteration	No alteration	No alteration	No alteration	No alteration	Alteration	No alteration	Alteration	No alteration	Alteration	Alteration	Alteration	Alteration	No alteration	No alteration	Alteration	No alteration	Alteration	Alteration	Alteration	No alteration	Alteration	No alteration	No alteration	Alteration	Alteration	Alteration
2114342	M	70	Glioneuronal and neuronal tumors	1	Dead	595	No alteration	No alteration	No alteration	Alteration	Alteration	Alteration	Alteration	Alteration	No alteration	Alteration	No alteration	No alteration	No alteration	No alteration	No alteration	No alteration	No alteration	No alteration	No alteration	No alteration	No alteration	No alteration	No alteration	No alteration	No alteration	No alteration	No alteration	Alteration	No alteration	No alteration	No alteration	Alteration	No alteration	No alteration	No alteration	No alteration	No alteration	Alteration	No alteration	No alteration	Alteration	No alteration	No alteration
2390699	M	63	Glioblastoma	4	Dead	603	No alteration	No alteration	No alteration	Alteration	Alteration	Alteration	No alteration	No alteration	No alteration	Alteration	No alteration	Alteration	Alteration	Alteration	Alteration	No alteration	No alteration	No alteration	No alteration	No alteration	No alteration	Alteration	No alteration	Alteration	No alteration	Alteration	Alteration	No alteration	No alteration	No alteration	No alteration	Alteration	No alteration	No alteration	No alteration	Alteration	No alteration	Alteration	No alteration	No alteration	Alteration	Alteration	No alteration
2294621	M	69	Glioblastoma	4	Dead	626	No alteration	No alteration	No alteration	Alteration	No alteration	Alteration	Alteration	Alteration	No alteration	Alteration	No alteration	Alteration	Alteration	Alteration	No alteration	No alteration	No alteration	No alteration	No alteration	No alteration	No alteration	Alteration	No alteration	Alteration	No alteration	No alteration	Alteration	Alteration	Alteration	No alteration	No alteration	No alteration	No alteration	No alteration	Alteration	Alteration	No alteration	Alteration	No alteration	No alteration	Alteration	Alteration	Alteration
W228586	F	63	Glioblastoma	4	Dead	629	No alteration	No alteration	No alteration	Alteration	No alteration	Alteration	No alteration	Alteration	No alteration	Alteration	No alteration	No alteration	Alteration	No alteration	No alteration	No alteration	No alteration	No alteration	No alteration	No alteration	No alteration	No alteration	No alteration	No alteration	No alteration	Alteration	No alteration	No alteration	No alteration	Alteration	No alteration	No alteration	No alteration	No alteration	No alteration	No alteration	Alteration	Alteration	No alteration	No alteration	Alteration	Alteration	No alteration
2243355	F	47	Glioblastoma	4	Dead	644	No alteration	No alteration	No alteration	Alteration	Alteration	Alteration	Alteration	No alteration	No alteration	Alteration	No alteration	Alteration	No alteration	No alteration	Alteration	No alteration	No alteration	No alteration	No alteration	No alteration	No alteration	Alteration	No alteration	Alteration	No alteration	Alteration	No alteration	Alteration	Alteration	No alteration	No alteration	Alteration	No alteration	Alteration	Alteration	Alteration	No alteration	Alteration	No alteration	No alteration	Alteration	Alteration	No alteration
2530634	M	46	Oligodendroglioma	2	Dead	648	No alteration	No alteration	No alteration	Alteration	Alteration	Alteration	Alteration	Alteration	No alteration	Alteration	No alteration	Alteration	Alteration	Alteration	Alteration	No alteration	No alteration	No alteration	No alteration	Alteration	No alteration	Alteration	Alteration	Alteration	No alteration	Alteration	Alteration	Alteration	Alteration	No alteration	No alteration	No alteration	No alteration	Alteration	Alteration	Alteration	Alteration	Alteration	No alteration	No alteration	Alteration	Alteration	Alteration
2075610	F	62	Glioblastoma	4	Dead	657	No alteration	No alteration	No alteration	Alteration	No alteration	Alteration	No alteration	Alteration	No alteration	Alteration	No alteration	No alteration	No alteration	Alteration	No alteration	No alteration	No alteration	No alteration	No alteration	No alteration	No alteration	No alteration	No alteration	No alteration	No alteration	Alteration	Alteration	Alteration	Alteration	No alteration	No alteration	Alteration	No alteration	No alteration	No alteration	No alteration	Alteration	No alteration	No alteration	Alteration	No alteration	Alteration	No alteration
2269447	M	33	Glioblastoma	4	Dead	726	No alteration	No alteration	No alteration	Alteration	No alteration	Alteration	No alteration	No alteration	No alteration	Alteration	No alteration	Alteration	No alteration	Alteration	Alteration	No alteration	No alteration	No alteration	No alteration	No alteration	No alteration	Alteration	No alteration	Alteration	No alteration	No alteration	Alteration	Alteration	Alteration	No alteration	No alteration	No alteration	No alteration	Alteration	No alteration	No alteration	Alteration	Alteration	No alteration	No alteration	Alteration	No alteration	No alteration
2092332	M	44	Glioblastoma	4	Dead	726	No alteration	No alteration	No alteration	Alteration	Alteration	Alteration	Alteration	Alteration	No alteration	Alteration	No alteration	Alteration	Alteration	No alteration	No alteration	No alteration	No alteration	No alteration	No alteration	No alteration	No alteration	No alteration	No alteration	No alteration	No alteration	No alteration	Alteration	No alteration	No alteration	No alteration	No alteration	Alteration	No alteration	No alteration	No alteration	Alteration	Alteration	Alteration	No alteration	No alteration	Alteration	Alteration	No alteration
2239021	F	39	Astrocytoma	4	Dead	732	No alteration	Alteration	No alteration	Alteration	No alteration	Alteration	Alteration	Alteration	No alteration	Alteration	No alteration	Alteration	Alteration	Alteration	Alteration	No alteration	No alteration	No alteration	No alteration	Alteration	No alteration	Alteration	No alteration	No alteration	No alteration	Alteration	Alteration	Alteration	Alteration	No alteration	No alteration	No alteration	No alteration	Alteration	Alteration	Alteration	No alteration	Alteration	No alteration	No alteration	Alteration	Alteration	No alteration
1784711	M	37	Astrocytoma	4	Dead	806	No alteration	Alteration	No alteration	Alteration	Alteration	Alteration	Alteration	Alteration	No alteration	No alteration	No alteration	Alteration	Alteration	No alteration	No alteration	No alteration	No alteration	No alteration	No alteration	Alteration	No alteration	No alteration	No alteration	Alteration	No alteration	No alteration	No alteration	No alteration	Alteration	Alteration	No alteration	Alteration	No alteration	Alteration	No alteration	Alteration	Alteration	Alteration	No alteration	No alteration	Alteration	Alteration	Alteration
2524667	M	51	Oligodendroglioma	2	Dead	821	No alteration	No alteration	No alteration	No alteration	Alteration	No alteration	No alteration	No alteration	No alteration	No alteration	No alteration	Alteration	No alteration	No alteration	No alteration	No alteration	No alteration	No alteration	No alteration	Alteration	No alteration	Alteration	No alteration	No alteration	No alteration	No alteration	No alteration	No alteration	No alteration	No alteration	No alteration	No alteration	No alteration	Alteration	No alteration	No alteration	Alteration	No alteration	No alteration	No alteration	Alteration	No alteration	No alteration
2515298	F	62	Glioblastoma	4	Dead	893	No alteration	No alteration	No alteration	No alteration	Alteration	No alteration	Alteration	No alteration	No alteration	No alteration	No alteration	Alteration	No alteration	No alteration	Alteration	No alteration	No alteration	No alteration	No alteration	No alteration	No alteration	Alteration	No alteration	No alteration	No alteration	No alteration	Alteration	No alteration	No alteration	No alteration	No alteration	No alteration	No alteration	Alteration	No alteration	Alteration	No alteration	No alteration	No alteration	No alteration	Alteration	Alteration	Alteration
2022114	M	66	Paediatric-type diffuse gliomas	4	Dead	908	No alteration	No alteration	No alteration	Alteration	No alteration	No alteration	No alteration	Alteration	No alteration	Alteration	Alteration	No alteration	No alteration	No alteration	No alteration	No alteration	No alteration	No alteration	No alteration	No alteration	No alteration	Alteration	Alteration	No alteration	No alteration	Alteration	No alteration	No alteration	Alteration	No alteration	Alteration	No alteration	No alteration	No alteration	No alteration	Alteration	No alteration	Alteration	No alteration	No alteration	Alteration	No alteration	No alteration
1725982	F	61	Paediatric-type diffuse gliomas	4	Dead	973	No alteration	No alteration	Alteration	No alteration	Alteration	Alteration	Alteration	Alteration	No alteration	No alteration	No alteration	No alteration	No alteration	No alteration	No alteration	No alteration	No alteration	No alteration	No alteration	No alteration	No alteration	No alteration	Alteration	Alteration	No alteration	No alteration	No alteration	No alteration	No alteration	Alteration	No alteration	Alteration	No alteration	No alteration	No alteration	Alteration	No alteration	Alteration	No alteration	No alteration	Alteration	Alteration	Alteration
2506487	M	49	Glioblastoma	4	Dead	990	No alteration	No alteration	No alteration	Alteration	No alteration	Alteration	No alteration	No alteration	No alteration	Alteration	No alteration	No alteration	No alteration	No alteration	Alteration	No alteration	No alteration	No alteration	No alteration	No alteration	No alteration	No alteration	No alteration	No alteration	No alteration	Alteration	No alteration	No alteration	Alteration	No alteration	Alteration	No alteration	No alteration	No alteration	Alteration	No alteration	Alteration	No alteration	No alteration	No alteration	Alteration	No alteration	No alteration
2507238	M	33	Oligodendroglioma	3	Dead	1005	No alteration	No alteration	No alteration	No alteration	Alteration	No alteration	Alteration	Alteration	No alteration	No alteration	Alteration	No alteration	No alteration	No alteration	No alteration	No alteration	No alteration	No alteration	No alteration	Alteration	No alteration	No alteration	No alteration	No alteration	No alteration	No alteration	No alteration	No alteration	No alteration	No alteration	No alteration	Alteration	No alteration	Alteration	No alteration	No alteration	Alteration	No alteration	No alteration	No alteration	Alteration	No alteration	No alteration
2504108	M	60	Glioblastoma	4	Dead	1017	No alteration	No alteration	No alteration	Alteration	Alteration	Alteration	Alteration	Alteration	No alteration	Alteration	No alteration	No alteration	Alteration	Alteration	No alteration	No alteration	No alteration	No alteration	No alteration	No alteration	No alteration	No alteration	No alteration	No alteration	No alteration	Alteration	No alteration	No alteration	No alteration	No alteration	No alteration	No alteration	No alteration	No alteration	No alteration	No alteration	Alteration	Alteration	No alteration	No alteration	Alteration	Alteration	No alteration
1561624	M	58	Paediatric-type diffuse gliomas	4	Dead	1019	No alteration	No alteration	No alteration	No alteration	No alteration	No alteration	No alteration	No alteration	No alteration	No alteration	No alteration	No alteration	No alteration	No alteration	No alteration	No alteration	No alteration	No alteration	No alteration	No alteration	No alteration	No alteration	Alteration	No alteration	No alteration	No alteration	No alteration	No alteration	No alteration	No alteration	No alteration	No alteration	No alteration	No alteration	No alteration	No alteration	No alteration	No alteration	No alteration	No alteration	Alteration	No alteration	No alteration
2503403	M	50	Oligodendroglioma	3	Dead	1031	No alteration	No alteration	No alteration	Alteration	Alteration	No alteration	No alteration	Alteration	No alteration	Alteration	No alteration	No alteration	Alteration	Alteration	No alteration	No alteration	No alteration	No alteration	No alteration	Alteration	No alteration	No alteration	No alteration	Alteration	No alteration	Alteration	Alteration	No alteration	No alteration	No alteration	No alteration	No alteration	No alteration	No alteration	No alteration	Alteration	Alteration	Alteration	No alteration	No alteration	Alteration	Alteration	Alteration
2073401	F	50	Paediatric-type diffuse gliomas	2	Dead	1056	No alteration	No alteration	No alteration	No alteration	No alteration	No alteration	Alteration	No alteration	Alteration	No alteration	No alteration	No alteration	No alteration	No alteration	No alteration	No alteration	No alteration	No alteration	No alteration	No alteration	No alteration	No alteration	No alteration	No alteration	No alteration	No alteration	No alteration	No alteration	No alteration	No alteration	No alteration	No alteration	No alteration	No alteration	No alteration	Alteration	Alteration	No alteration	No alteration	No alteration	Alteration	No alteration	No alteration
2500626	M	42	Oligodendroglioma	2	Dead	1074	No alteration	No alteration	No alteration	Alteration	Alteration	Alteration	No alteration	No alteration	Alteration	No alteration	No alteration	Alteration	No alteration	No alteration	Alteration	Alteration	No alteration	No alteration	No alteration	Alteration	No alteration	Alteration	Alteration	Alteration	No alteration	No alteration	No alteration	Alteration	Alteration	Alteration	No alteration	No alteration	No alteration	Alteration	Alteration	Alteration	Alteration	Alteration	No alteration	No alteration	Alteration	Alteration	No alteration
2500736	F	41	Paediatric-type diffuse gliomas	4	Dead	1075	No alteration	Alteration	No alteration	No alteration	Alteration	Alteration	Alteration	Alteration	No alteration	Alteration	No alteration	Alteration	Alteration	Alteration	Alteration	No alteration	No alteration	No alteration	No alteration	No alteration	No alteration	No alteration	No alteration	No alteration	No alteration	No alteration	No alteration	No alteration	No alteration	Alteration	Alteration	No alteration	No alteration	Alteration	Alteration	No alteration	Alteration	Alteration	No alteration	No alteration	Alteration	Alteration	Alteration
2500540	M	37	Astrocytoma	2	Dead	1080	No alteration	Alteration	No alteration	No alteration	No alteration	Alteration	No alteration	No alteration	No alteration	No alteration	No alteration	Alteration	Alteration	Alteration	Alteration	No alteration	No alteration	No alteration	No alteration	Alteration	No alteration	No alteration	No alteration	No alteration	No alteration	No alteration	No alteration	No alteration	No alteration	Alteration	No alteration	No alteration	No alteration	Alteration	No alteration	No alteration	No alteration	No alteration	No alteration	No alteration	Alteration	Alteration	No alteration
2214777	M	29	Astrocytoma	2	Dead	1089	No alteration	Alteration	No alteration	No alteration	No alteration	No alteration	No alteration	No alteration	No alteration	No alteration	No alteration	No alteration	No alteration	No alteration	No alteration	No alteration	No alteration	No alteration	No alteration	Alteration	No alteration	No alteration	Alteration	No alteration	No alteration	No alteration	No alteration	No alteration	No alteration	No alteration	No alteration	No alteration	No alteration	No alteration	No alteration	No alteration	Alteration	Alteration	No alteration	No alteration	Alteration	No alteration	No alteration
2297201	M	39	Oligodendroglioma	2	Dead	1094	No alteration	No alteration	No alteration	Alteration	Alteration	Alteration	No alteration	Alteration	No alteration	No alteration	No alteration	No alteration	Alteration	No alteration	No alteration	Alteration	No alteration	No alteration	No alteration	Alteration	No alteration	Alteration	No alteration	No alteration	No alteration	Alteration	Alteration	No alteration	No alteration	No alteration	Alteration	No alteration	No alteration	No alteration	Alteration	No alteration	Alteration	No alteration	No alteration	No alteration	Alteration	No alteration	No alteration
2298005	F	29	Oligodendroglioma	2	Dead	1096	No alteration	No alteration	No alteration	No alteration	Alteration	No alteration	No alteration	No alteration	Alteration	Alteration	No alteration	Alteration	No alteration	No alteration	Alteration	No alteration	No alteration	No alteration	No alteration	Alteration	No alteration	Alteration	No alteration	No alteration	No alteration	No alteration	No alteration	No alteration	No alteration	Alteration	No alteration	No alteration	No alteration	Alteration	Alteration	No alteration	Alteration	No alteration	No alteration	No alteration	Alteration	Alteration	No alteration
2240569	M	51	Oligodendroglioma	3	Dead	1128	No alteration	No alteration	No alteration	Alteration	Alteration	Alteration	Alteration	Alteration	Alteration	Alteration	No alteration	No alteration	No alteration	Alteration	No alteration	Alteration	No alteration	No alteration	No alteration	Alteration	No alteration	No alteration	No alteration	Alteration	No alteration	No alteration	No alteration	No alteration	No alteration	No alteration	No alteration	Alteration	No alteration	Alteration	Alteration	Alteration	Alteration	Alteration	No alteration	No alteration	Alteration	Alteration	No alteration
2295554	F	38	Oligodendroglioma	2	Dead	1129	No alteration	No alteration	No alteration	No alteration	No alteration	No alteration	No alteration	No alteration	No alteration	No alteration	No alteration	Alteration	No alteration	No alteration	No alteration	No alteration	No alteration	No alteration	No alteration	Alteration	No alteration	Alteration	No alteration	No alteration	No alteration	No alteration	No alteration	No alteration	No alteration	No alteration	No alteration	No alteration	No alteration	No alteration	Alteration	No alteration	Alteration	Alteration	No alteration	No alteration	Alteration	No alteration	No alteration
2207368	M	28	Oligodendroglioma	3	Dead	1187	No alteration	No alteration	No alteration	No alteration	Alteration	No alteration	No alteration	No alteration	No alteration	No alteration	No alteration	No alteration	No alteration	No alteration	No alteration	No alteration	No alteration	No alteration	No alteration	Alteration	No alteration	No alteration	No alteration	No alteration	No alteration	No alteration	No alteration	No alteration	No alteration	No alteration	No alteration	No alteration	No alteration	No alteration	No alteration	No alteration	Alteration	No alteration	No alteration	No alteration	Alteration	No alteration	No alteration
2023975	M	45	Paediatric-type diffuse gliomas	4	Dead	1214	No alteration	No alteration	No alteration	Alteration	Alteration	No alteration	Alteration	Alteration	No alteration	Alteration	No alteration	Alteration	No alteration	No alteration	Alteration	No alteration	Alteration	No alteration	No alteration	No alteration	No alteration	Alteration	No alteration	No alteration	No alteration	Alteration	Alteration	No alteration	No alteration	Alteration	No alteration	Alteration	No alteration	No alteration	Alteration	Alteration	No alteration	Alteration	Alteration	Alteration	Alteration	Alteration	Alteration
2283191	M	23	Glioblastoma	4	Dead	1255	No alteration	No alteration	No alteration	Alteration	No alteration	Alteration	Alteration	Alteration	No alteration	Alteration	No alteration	No alteration	No alteration	No alteration	No alteration	No alteration	No alteration	No alteration	No alteration	No alteration	No alteration	Alteration	No alteration	No alteration	No alteration	Alteration	No alteration	Alteration	Alteration	Alteration	Alteration	No alteration	No alteration	Alteration	Alteration	Alteration	No alteration	No alteration	No alteration	No alteration	Alteration	No alteration	Alteration
2233809	M	53	Astrocytoma	4	Dead	1260	No alteration	Alteration	No alteration	No alteration	No alteration	No alteration	Alteration	Alteration	No alteration	No alteration	No alteration	No alteration	No alteration	No alteration	Alteration	No alteration	No alteration	No alteration	No alteration	Alteration	No alteration	Alteration	No alteration	No alteration	No alteration	No alteration	Alteration	No alteration	Alteration	No alteration	No alteration	No alteration	No alteration	Alteration	No alteration	Alteration	No alteration	No alteration	No alteration	No alteration	Alteration	No alteration	No alteration
2270955	M	50	Oligodendroglioma	3	Dead	1278	No alteration	No alteration	No alteration	Alteration	Alteration	Alteration	Alteration	Alteration	No alteration	Alteration	No alteration	Alteration	No alteration	Alteration	No alteration	Alteration	No alteration	No alteration	No alteration	Alteration	No alteration	Alteration	No alteration	Alteration	No alteration	Alteration	Alteration	Alteration	No alteration	Alteration	No alteration	No alteration	No alteration	Alteration	Alteration	Alteration	Alteration	Alteration	No alteration	No alteration	Alteration	Alteration	No alteration
2276980	F	32	Glioblastoma	4	Dead	1299	No alteration	No alteration	No alteration	No alteration	No alteration	No alteration	No alteration	No alteration	No alteration	No alteration	No alteration	No alteration	No alteration	No alteration	No alteration	No alteration	No alteration	No alteration	No alteration	No alteration	No alteration	Alteration	No alteration	No alteration	No alteration	No alteration	No alteration	No alteration	No alteration	No alteration	No alteration	No alteration	No alteration	No alteration	Alteration	No alteration	No alteration	Alteration	No alteration	No alteration	Alteration	No alteration	No alteration
2082664	F	34	Glioblastoma	4	Dead	1300	No alteration	No alteration	No alteration	Alteration	No alteration	No alteration	Alteration	Alteration	No alteration	No alteration	No alteration	No alteration	No alteration	No alteration	No alteration	No alteration	No alteration	No alteration	No alteration	No alteration	No alteration	No alteration	No alteration	No alteration	No alteration	No alteration	No alteration	No alteration	No alteration	No alteration	No alteration	Alteration	No alteration	Alteration	No alteration	No alteration	No alteration	Alteration	No alteration	No alteration	Alteration	No alteration	No alteration
2267110	F	65	Astrocytoma	4	Dead	1342	No alteration	Alteration	No alteration	Alteration	Alteration	Alteration	Alteration	Alteration	No alteration	No alteration	No alteration	Alteration	Alteration	Alteration	Alteration	No alteration	No alteration	No alteration	No alteration	Alteration	No alteration	Alteration	No alteration	Alteration	No alteration	No alteration	Alteration	Alteration	Alteration	No alteration	No alteration	Alteration	No alteration	No alteration	Alteration	Alteration	Alteration	Alteration	No alteration	No alteration	Alteration	No alteration	No alteration
2268526	M	33	Paediatric-type diffuse gliomas	2	Dead	1388	No alteration	No alteration	No alteration	No alteration	No alteration	No alteration	No alteration	No alteration	No alteration	No alteration	No alteration	Alteration	No alteration	No alteration	No alteration	No alteration	No alteration	No alteration	No alteration	No alteration	No alteration	No alteration	No alteration	No alteration	No alteration	No alteration	Alteration	No alteration	No alteration	No alteration	No alteration	Alteration	No alteration	No alteration	No alteration	No alteration	No alteration	Alteration	No alteration	No alteration	Alteration	No alteration	No alteration
2267727	M	46	Oligodendroglioma	3	Dead	1402	No alteration	No alteration	No alteration	No alteration	No alteration	No alteration	Alteration	Alteration	Alteration	No alteration	No alteration	No alteration	No alteration	No alteration	No alteration	Alteration	No alteration	No alteration	No alteration	Alteration	No alteration	No alteration	No alteration	Alteration	No alteration	No alteration	No alteration	No alteration	No alteration	No alteration	No alteration	Alteration	No alteration	No alteration	No alteration	No alteration	Alteration	Alteration	No alteration	No alteration	Alteration	No alteration	No alteration
2266424	M	60	Oligodendroglioma	3	Dead	1427	No alteration	No alteration	No alteration	No alteration	No alteration	No alteration	No alteration	No alteration	Alteration	No alteration	No alteration	No alteration	No alteration	No alteration	No alteration	No alteration	No alteration	No alteration	No alteration	Alteration	No alteration	No alteration	No alteration	No alteration	No alteration	No alteration	No alteration	No alteration	No alteration	No alteration	No alteration	No alteration	No alteration	Alteration	No alteration	No alteration	Alteration	Alteration	No alteration	No alteration	Alteration	Alteration	No alteration
2258231	M	30	Astrocytoma	3	Dead	1467	No alteration	Alteration	No alteration	Alteration	Alteration	No alteration	No alteration	No alteration	Alteration	Alteration	No alteration	Alteration	No alteration	No alteration	No alteration	No alteration	No alteration	No alteration	No alteration	Alteration	No alteration	No alteration	No alteration	Alteration	No alteration	Alteration	Alteration	Alteration	Alteration	No alteration	No alteration	No alteration	No alteration	Alteration	No alteration	Alteration	No alteration	Alteration	No alteration	No alteration	Alteration	Alteration	Alteration
2234885	M	20	Oligodendroglioma	2	Dead	1486	No alteration	No alteration	Alteration	Alteration	No alteration	No alteration	No alteration	No alteration	No alteration	No alteration	No alteration	No alteration	No alteration	No alteration	No alteration	No alteration	No alteration	No alteration	No alteration	Alteration	No alteration	Alteration	No alteration	No alteration	No alteration	No alteration	No alteration	No alteration	No alteration	Alteration	No alteration	Alteration	No alteration	No alteration	No alteration	No alteration	No alteration	No alteration	No alteration	Alteration	No alteration	No alteration	No alteration
1721732	M	45	Astrocytoma	2	Dead	1545	No alteration	No alteration	No alteration	Alteration	No alteration	No alteration	Alteration	No alteration	No alteration	Alteration	No alteration	No alteration	No alteration	Alteration	Alteration	No alteration	No alteration	No alteration	No alteration	Alteration	No alteration	Alteration	No alteration	Alteration	No alteration	No alteration	Alteration	No alteration	No alteration	No alteration	No alteration	Alteration	No alteration	No alteration	Alteration	No alteration	No alteration	Alteration	No alteration	No alteration	Alteration	Alteration	Alteration
2245014	M	48	Oligodendroglioma	2	Dead	1565	No alteration	No alteration	No alteration	Alteration	Alteration	No alteration	Alteration	Alteration	Alteration	Alteration	No alteration	Alteration	Alteration	No alteration	Alteration	No alteration	No alteration	No alteration	No alteration	Alteration	No alteration	No alteration	No alteration	Alteration	No alteration	No alteration	Alteration	No alteration	Alteration	No alteration	No alteration	No alteration	No alteration	Alteration	Alteration	Alteration	Alteration	Alteration	No alteration	No alteration	Alteration	Alteration	Alteration
2031899	F	41	Astrocytoma	2	Dead	1592	No alteration	Alteration	No alteration	Alteration	Alteration	No alteration	No alteration	Alteration	No alteration	No alteration	No alteration	No alteration	No alteration	No alteration	No alteration	No alteration	No alteration	No alteration	No alteration	Alteration	No alteration	No alteration	Alteration	Alteration	No alteration	No alteration	No alteration	No alteration	Alteration	No alteration	No alteration	Alteration	No alteration	Alteration	No alteration	No alteration	No alteration	Alteration	No alteration	No alteration	Alteration	Alteration	No alteration
2229442	M	37	Astrocytoma	3	Dead	1607	No alteration	Alteration	No alteration	No alteration	No alteration	No alteration	No alteration	No alteration	No alteration	No alteration	No alteration	No alteration	No alteration	No alteration	No alteration	No alteration	No alteration	No alteration	No alteration	Alteration	No alteration	Alteration	No alteration	Alteration	No alteration	Alteration	No alteration	No alteration	Alteration	No alteration	No alteration	No alteration	No alteration	No alteration	No alteration	Alteration	No alteration	Alteration	Alteration	No alteration	Alteration	No alteration	No alteration
2241426	F	40	Oligodendroglioma	2	Dead	1612	No alteration	No alteration	No alteration	No alteration	Alteration	No alteration	No alteration	No alteration	Alteration	No alteration	No alteration	No alteration	No alteration	No alteration	No alteration	Alteration	No alteration	No alteration	No alteration	Alteration	No alteration	No alteration	No alteration	Alteration	No alteration	No alteration	No alteration	No alteration	No alteration	No alteration	No alteration	No alteration	No alteration	Alteration	No alteration	No alteration	Alteration	Alteration	No alteration	No alteration	Alteration	No alteration	No alteration
2239655	M	32	Oligodendroglioma	2	Dead	1647	No alteration	No alteration	No alteration	Alteration	No alteration	No alteration	No alteration	No alteration	No alteration	No alteration	No alteration	No alteration	No alteration	No alteration	No alteration	No alteration	No alteration	No alteration	No alteration	Alteration	No alteration	No alteration	No alteration	No alteration	No alteration	No alteration	No alteration	No alteration	No alteration	No alteration	No alteration	No alteration	No alteration	No alteration	No alteration	No alteration	Alteration	Alteration	No alteration	No alteration	Alteration	Alteration	No alteration
2241833	M	10	Paediatric-type diffuse gliomas	2	Dead	1654	No alteration	No alteration	No alteration	Alteration	No alteration	No alteration	Alteration	Alteration	No alteration	No alteration	No alteration	Alteration	No alteration	No alteration	Alteration	No alteration	No alteration	No alteration	No alteration	No alteration	No alteration	Alteration	No alteration	Alteration	No alteration	Alteration	Alteration	No alteration	No alteration	Alteration	No alteration	No alteration	No alteration	Alteration	Alteration	No alteration	No alteration	No alteration	No alteration	No alteration	Alteration	No alteration	No alteration
2063879	F	42	Astrocytoma	2	Dead	1661	No alteration	No alteration	No alteration	Alteration	No alteration	No alteration	No alteration	Alteration	No alteration	Alteration	No alteration	No alteration	No alteration	No alteration	No alteration	No alteration	No alteration	No alteration	No alteration	Alteration	No alteration	No alteration	No alteration	Alteration	No alteration	Alteration	No alteration	Alteration	No alteration	No alteration	No alteration	No alteration	No alteration	No alteration	No alteration	No alteration	No alteration	Alteration	No alteration	No alteration	Alteration	Alteration	No alteration
2237857	M	49	Oligodendroglioma	2	Dead	1684	No alteration	No alteration	No alteration	No alteration	No alteration	No alteration	No alteration	No alteration	Alteration	Alteration	No alteration	No alteration	Alteration	No alteration	No alteration	No alteration	No alteration	No alteration	No alteration	Alteration	No alteration	No alteration	No alteration	No alteration	No alteration	No alteration	No alteration	No alteration	No alteration	No alteration	No alteration	No alteration	No alteration	No alteration	No alteration	Alteration	Alteration	No alteration	No alteration	No alteration	Alteration	No alteration	No alteration
1882714	M	47	Paediatric-type diffuse gliomas	2	Dead	1691	No alteration	No alteration	No alteration	Alteration	Alteration	No alteration	No alteration	Alteration	No alteration	No alteration	No alteration	No alteration	No alteration	No alteration	No alteration	No alteration	No alteration	No alteration	No alteration	No alteration	No alteration	No alteration	Alteration	No alteration	No alteration	No alteration	Alteration	No alteration	No alteration	No alteration	No alteration	No alteration	No alteration	No alteration	No alteration	No alteration	No alteration	Alteration	No alteration	No alteration	Alteration	Alteration	No alteration
2027406	F	44	Glioblastoma	4	Dead	1722	No alteration	No alteration	No alteration	Alteration	No alteration	Alteration	Alteration	Alteration	No alteration	Alteration	No alteration	Alteration	Alteration	No alteration	No alteration	No alteration	No alteration	No alteration	No alteration	No alteration	No alteration	No alteration	No alteration	No alteration	No alteration	Alteration	Alteration	No alteration	Alteration	No alteration	No alteration	No alteration	No alteration	Alteration	Alteration	Alteration	Alteration	No alteration	No alteration	No alteration	Alteration	Alteration	No alteration
2234706	M	44	Astrocytoma	2	Dead	1726	No alteration	No alteration	No alteration	No alteration	No alteration	No alteration	No alteration	No alteration	Alteration	No alteration	No alteration	No alteration	No alteration	No alteration	No alteration	No alteration	No alteration	No alteration	No alteration	Alteration	No alteration	No alteration	No alteration	No alteration	No alteration	No alteration	No alteration	No alteration	No alteration	No alteration	No alteration	Alteration	No alteration	Alteration	No alteration	No alteration	Alteration	No alteration	No alteration	Alteration	No alteration	No alteration	No alteration
2075259	M	28	Astrocytoma	2	Dead	1792	No alteration	Alteration	No alteration	Alteration	Alteration	No alteration	No alteration	No alteration	No alteration	No alteration	No alteration	No alteration	No alteration	No alteration	No alteration	No alteration	No alteration	No alteration	No alteration	Alteration	No alteration	No alteration	No alteration	No alteration	No alteration	No alteration	No alteration	No alteration	Alteration	No alteration	No alteration	Alteration	No alteration	Alteration	No alteration	No alteration	Alteration	Alteration	No alteration	No alteration	Alteration	Alteration	No alteration
2221999	M	48	Glioblastoma	4	Dead	1824	No alteration	No alteration	No alteration	No alteration	Alteration	No alteration	No alteration	No alteration	No alteration	No alteration	No alteration	Alteration	No alteration	No alteration	No alteration	No alteration	No alteration	No alteration	No alteration	No alteration	No alteration	No alteration	No alteration	No alteration	No alteration	No alteration	No alteration	No alteration	No alteration	No alteration	No alteration	No alteration	No alteration	No alteration	No alteration	No alteration	No alteration	No alteration	No alteration	No alteration	Alteration	No alteration	No alteration
2216926	F	57	Astrocytoma	2	Dead	1849	No alteration	Alteration	No alteration	Alteration	No alteration	Alteration	Alteration	No alteration	No alteration	Alteration	No alteration	No alteration	No alteration	No alteration	No alteration	No alteration	No alteration	No alteration	No alteration	Alteration	No alteration	No alteration	No alteration	Alteration	No alteration	No alteration	No alteration	No alteration	Alteration	No alteration	No alteration	Alteration	No alteration	Alteration	No alteration	No alteration	No alteration	Alteration	No alteration	No alteration	Alteration	Alteration	Alteration
2214752	M	37	Astrocytoma	2	Dead	1899	No alteration	Alteration	No alteration	Alteration	Alteration	Alteration	No alteration	Alteration	No alteration	No alteration	No alteration	No alteration	No alteration	No alteration	No alteration	Alteration	No alteration	No alteration	No alteration	Alteration	No alteration	No alteration	Alteration	Alteration	No alteration	Alteration	Alteration	No alteration	No alteration	No alteration	No alteration	No alteration	No alteration	No alteration	No alteration	Alteration	No alteration	Alteration	No alteration	No alteration	Alteration	No alteration	Alteration
2213594	M	39	Oligodendroglioma	2	Dead	1915	No alteration	No alteration	No alteration	Alteration	No alteration	Alteration	No alteration	Alteration	No alteration	No alteration	No alteration	Alteration	No alteration	No alteration	Alteration	No alteration	No alteration	No alteration	No alteration	Alteration	No alteration	No alteration	No alteration	No alteration	No alteration	Alteration	Alteration	No alteration	Alteration	No alteration	No alteration	Alteration	No alteration	No alteration	No alteration	Alteration	Alteration	No alteration	No alteration	No alteration	Alteration	Alteration	No alteration
2207368	M	25	Oligodendroglioma	2	Dead	1969	No alteration	No alteration	No alteration	Alteration	Alteration	Alteration	No alteration	Alteration	No alteration	Alteration	No alteration	No alteration	No alteration	No alteration	No alteration	No alteration	No alteration	No alteration	No alteration	Alteration	No alteration	No alteration	No alteration	Alteration	No alteration	No alteration	Alteration	No alteration	No alteration	No alteration	No alteration	No alteration	No alteration	No alteration	No alteration	Alteration	Alteration	Alteration	No alteration	No alteration	Alteration	No alteration	No alteration
2206000	M	46	Astrocytoma	4	Dead	1976	No alteration	No alteration	No alteration	No alteration	Alteration	No alteration	Alteration	Alteration	Alteration	Alteration	No alteration	Alteration	Alteration	No alteration	No alteration	No alteration	No alteration	No alteration	No alteration	Alteration	No alteration	No alteration	No alteration	No alteration	No alteration	No alteration	Alteration	No alteration	Alteration	No alteration	No alteration	No alteration	No alteration	No alteration	Alteration	Alteration	Alteration	No alteration	No alteration	No alteration	Alteration	Alteration	No alteration
2205500	M	46	Astrocytoma	4	Dead	1978	No alteration	Alteration	No alteration	Alteration	Alteration	Alteration	Alteration	Alteration	No alteration	Alteration	No alteration	No alteration	No alteration	No alteration	No alteration	No alteration	No alteration	No alteration	No alteration	Alteration	No alteration	No alteration	No alteration	No alteration	No alteration	Alteration	No alteration	No alteration	No alteration	No alteration	No alteration	No alteration	Alteration	No alteration	No alteration	No alteration	No alteration	No alteration	No alteration	No alteration	Alteration	Alteration	No alteration
2053346	M	44	Astrocytoma	4	Dead	1987	No alteration	Alteration	No alteration	Alteration	No alteration	Alteration	Alteration	Alteration	No alteration	Alteration	No alteration	No alteration	No alteration	Alteration	No alteration	No alteration	No alteration	Alteration	No alteration	Alteration	No alteration	No alteration	No alteration	No alteration	No alteration	Alteration	Alteration	No alteration	Alteration	No alteration	No alteration	No alteration	No alteration	No alteration	Alteration	No alteration	Alteration	Alteration	No alteration	No alteration	Alteration	No alteration	No alteration
1729208	M	48	Oligodendroglioma	3	Dead	2003	No alteration	No alteration	No alteration	No alteration	No alteration	No alteration	No alteration	No alteration	No alteration	Alteration	No alteration	Alteration	Alteration	Alteration	No alteration	No alteration	No alteration	No alteration	No alteration	No alteration	Alteration	Alteration	No alteration	No alteration	No alteration	No alteration	No alteration	No alteration	Alteration	Alteration	No alteration	Alteration	No alteration	No alteration	No alteration	Alteration	Alteration	No alteration	No alteration	No alteration	Alteration	Alteration	Alteration
1618910	M	52	Astrocytoma	4	Dead	2064	No alteration	Alteration	No alteration	No alteration	No alteration	Alteration	Alteration	Alteration	No alteration	No alteration	No alteration	No alteration	No alteration	No alteration	No alteration	No alteration	No alteration	No alteration	No alteration	Alteration	No alteration	No alteration	No alteration	Alteration	No alteration	No alteration	No alteration	No alteration	Alteration	No alteration	No alteration	No alteration	No alteration	No alteration	No alteration	No alteration	No alteration	Alteration	No alteration	No alteration	Alteration	No alteration	No alteration
2040631	F	43	Astrocytoma	2	Dead	2146	No alteration	Alteration	No alteration	No alteration	Alteration	No alteration	No alteration	No alteration	No alteration	No alteration	No alteration	No alteration	No alteration	No alteration	No alteration	No alteration	No alteration	No alteration	No alteration	Alteration	No alteration	No alteration	Alteration	Alteration	No alteration	No alteration	No alteration	No alteration	No alteration	No alteration	No alteration	Alteration	No alteration	Alteration	No alteration	No alteration	No alteration	No alteration	No alteration	No alteration	Alteration	Alteration	Alteration
2089442	F	36	Astrocytoma	2	Dead	2160	No alteration	No alteration	No alteration	Alteration	Alteration	Alteration	Alteration	Alteration	No alteration	Alteration	No alteration	Alteration	No alteration	No alteration	No alteration	No alteration	No alteration	No alteration	No alteration	Alteration	No alteration	No alteration	No alteration	No alteration	No alteration	No alteration	No alteration	No alteration	Alteration	No alteration	No alteration	Alteration	No alteration	Alteration	No alteration	Alteration	No alteration	No alteration	No alteration	No alteration	Alteration	No alteration	No alteration
2084707	F	44	Astrocytoma	3	Dead	2193	No alteration	Alteration	No alteration	No alteration	Alteration	Alteration	Alteration	Alteration	No alteration	No alteration	No alteration	Alteration	No alteration	No alteration	No alteration	No alteration	No alteration	No alteration	No alteration	Alteration	No alteration	No alteration	No alteration	Alteration	No alteration	Alteration	No alteration	Alteration	Alteration	Alteration	No alteration	No alteration	No alteration	Alteration	No alteration	Alteration	No alteration	Alteration	No alteration	No alteration	Alteration	No alteration	No alteration
2021963	M	43	Paediatric-type diffuse gliomas	4	Dead	2258	No alteration	No alteration	No alteration	Alteration	No alteration	Alteration	Alteration	Alteration	No alteration	No alteration	No alteration	No alteration	No alteration	No alteration	No alteration	No alteration	No alteration	No alteration	No alteration	No alteration	No alteration	No alteration	No alteration	No alteration	No alteration	No alteration	No alteration	No alteration	Alteration	Alteration	No alteration	Alteration	Alteration	Alteration	No alteration	Alteration	No alteration	Alteration	No alteration	No alteration	Alteration	Alteration	No alteration
1544024	F	28	Circumscribed astrocytic gliomas	2	Dead	2265	No alteration	No alteration	No alteration	Alteration	No alteration	Alteration	No alteration	No alteration	No alteration	Alteration	No alteration	Alteration	Alteration	Alteration	Alteration	No alteration	No alteration	No alteration	No alteration	No alteration	No alteration	No alteration	No alteration	No alteration	No alteration	No alteration	No alteration	No alteration	Alteration	No alteration	No alteration	No alteration	No alteration	No alteration	Alteration	No alteration	No alteration	Alteration	No alteration	No alteration	Alteration	Alteration	No alteration
2075994	M	62	Oligodendroglioma	2	Dead	2292	No alteration	No alteration	No alteration	No alteration	Alteration	No alteration	No alteration	Alteration	Alteration	No alteration	No alteration	No alteration	No alteration	Alteration	Alteration	No alteration	No alteration	No alteration	No alteration	Alteration	No alteration	No alteration	Alteration	No alteration	No alteration	No alteration	Alteration	No alteration	No alteration	No alteration	No alteration	Alteration	No alteration	Alteration	Alteration	No alteration	Alteration	Alteration	No alteration	No alteration	Alteration	Alteration	No alteration
2038849	F	69	Glioblastoma	4	Dead	2320	No alteration	No alteration	No alteration	Alteration	No alteration	Alteration	No alteration	Alteration	No alteration	Alteration	No alteration	Alteration	Alteration	No alteration	No alteration	No alteration	No alteration	No alteration	No alteration	No alteration	No alteration	No alteration	No alteration	No alteration	No alteration	Alteration	No alteration	No alteration	No alteration	No alteration	No alteration	No alteration	No alteration	No alteration	No alteration	Alteration	No alteration	No alteration	No alteration	No alteration	Alteration	Alteration	No alteration
1617424	F	20	Glioblastoma	4	Dead	2346	No alteration	No alteration	No alteration	Alteration	No alteration	Alteration	Alteration	Alteration	No alteration	Alteration	No alteration	No alteration	Alteration	No alteration	No alteration	No alteration	No alteration	No alteration	No alteration	No alteration	No alteration	No alteration	No alteration	Alteration	No alteration	No alteration	No alteration	Alteration	No alteration	No alteration	No alteration	Alteration	No alteration	No alteration	No alteration	Alteration	No alteration	Alteration	No alteration	No alteration	Alteration	No alteration	No alteration
2065476	M	65	Paediatric-type diffuse gliomas	2	Dead	2410	No alteration	No alteration	No alteration	No alteration	No alteration	No alteration	No alteration	Alteration	No alteration	No alteration	No alteration	No alteration	No alteration	No alteration	No alteration	No alteration	No alteration	No alteration	No alteration	No alteration	No alteration	No alteration	Alteration	No alteration	No alteration	No alteration	Alteration	No alteration	No alteration	No alteration	No alteration	No alteration	No alteration	No alteration	No alteration	Alteration	No alteration	Alteration	No alteration	No alteration	Alteration	Alteration	No alteration
2057952	M	34	Astrocytoma	2	Dead	2509	No alteration	No alteration	No alteration	Alteration	Alteration	No alteration	No alteration	No alteration	No alteration	No alteration	No alteration	No alteration	Alteration	Alteration	No alteration	No alteration	No alteration	No alteration	No alteration	Alteration	No alteration	No alteration	No alteration	Alteration	No alteration	Alteration	No alteration	No alteration	No alteration	No alteration	No alteration	Alteration	No alteration	Alteration	No alteration	No alteration	No alteration	Alteration	No alteration	No alteration	Alteration	Alteration	No alteration
2236930	F	43	Paediatric-type diffuse gliomas	4	Dead	2514	No alteration	No alteration	No alteration	Alteration	No alteration	No alteration	No alteration	No alteration	No alteration	No alteration	No alteration	Alteration	No alteration	No alteration	No alteration	No alteration	No alteration	No alteration	No alteration	No alteration	No alteration	No alteration	No alteration	Alteration	No alteration	No alteration	No alteration	Alteration	No alteration	No alteration	No alteration	No alteration	No alteration	No alteration	No alteration	No alteration	No alteration	Alteration	No alteration	No alteration	Alteration	Alteration	No alteration
2052571	M	35	Oligodendroglioma	2	Dead	2543	No alteration	No alteration	No alteration	No alteration	No alteration	No alteration	No alteration	No alteration	No alteration	No alteration	No alteration	No alteration	No alteration	No alteration	No alteration	No alteration	No alteration	No alteration	No alteration	Alteration	No alteration	No alteration	No alteration	No alteration	No alteration	No alteration	No alteration	No alteration	No alteration	No alteration	No alteration	No alteration	No alteration	No alteration	No alteration	No alteration	Alteration	No alteration	No alteration	No alteration	Alteration	No alteration	No alteration
2052252	F	31	Oligodendroglioma	3	Dead	2550	No alteration	No alteration	No alteration	No alteration	No alteration	No alteration	Alteration	Alteration	Alteration	No alteration	No alteration	No alteration	No alteration	Alteration	No alteration	No alteration	No alteration	No alteration	No alteration	Alteration	No alteration	Alteration	No alteration	No alteration	No alteration	No alteration	No alteration	No alteration	No alteration	No alteration	No alteration	No alteration	No alteration	No alteration	No alteration	Alteration	Alteration	Alteration	No alteration	No alteration	Alteration	No alteration	No alteration
2042240	F	41	Oligodendroglioma	2	Dead	2657	No alteration	No alteration	No alteration	Alteration	No alteration	Alteration	No alteration	Alteration	No alteration	Alteration	No alteration	No alteration	No alteration	No alteration	No alteration	No alteration	No alteration	No alteration	No alteration	Alteration	No alteration	No alteration	No alteration	No alteration	No alteration	Alteration	No alteration	No alteration	Alteration	No alteration	No alteration	No alteration	No alteration	No alteration	No alteration	No alteration	Alteration	Alteration	No alteration	No alteration	Alteration	No alteration	No alteration
2021607	F	31	Oligodendroglioma	3	Dead	2908	No alteration	No alteration	No alteration	Alteration	No alteration	No alteration	No alteration	No alteration	No alteration	Alteration	No alteration	No alteration	Alteration	No alteration	No alteration	No alteration	No alteration	No alteration	No alteration	Alteration	No alteration	Alteration	No alteration	Alteration	No alteration	Alteration	Alteration	No alteration	No alteration	No alteration	No alteration	No alteration	No alteration	No alteration	Alteration	Alteration	Alteration	No alteration	No alteration	No alteration	Alteration	Alteration	Alteration
1785797	M	13	Glioneuronal and neuronal tumors	1	Dead	3214	No alteration	No alteration	No alteration	No alteration	No alteration	No alteration	No alteration	No alteration	No alteration	No alteration	No alteration	No alteration	No alteration	No alteration	No alteration	No alteration	No alteration	No alteration	No alteration	No alteration	No alteration	No alteration	No alteration	No alteration	No alteration	No alteration	No alteration	No alteration	No alteration	No alteration	No alteration	No alteration	No alteration	No alteration	No alteration	No alteration	No alteration	Alteration	No alteration	No alteration	Alteration	No alteration	No alteration
w232713	M	37	Oligodendroglioma	2	Dead	3343	No alteration	No alteration	No alteration	No alteration	No alteration	No alteration	No alteration	Alteration	Alteration	No alteration	No alteration	No alteration	No alteration	No alteration	No alteration	No alteration	No alteration	No alteration	No alteration	Alteration	No alteration	No alteration	No alteration	Alteration	No alteration	No alteration	No alteration	No alteration	No alteration	No alteration	No alteration	No alteration	No alteration	No alteration	No alteration	Alteration	Alteration	Alteration	No alteration	No alteration	Alteration	Alteration	No alteration
w233251	M	53	Paediatric-type diffuse gliomas	4	Dead	3350	No alteration	No alteration	No alteration	No alteration	No alteration	No alteration	No alteration	No alteration	No alteration	No alteration	No alteration	No alteration	No alteration	No alteration	No alteration	No alteration	No alteration	No alteration	No alteration	No alteration	No alteration	No alteration	No alteration	No alteration	No alteration	No alteration	No alteration	No alteration	No alteration	No alteration	No alteration	No alteration	No alteration	No alteration	No alteration	No alteration	No alteration	No alteration	No alteration	No alteration	Alteration	No alteration	No alteration
1654997	M	22	Glioneuronal and neuronal tumors	1	Dead	3383	No alteration	No alteration	No alteration	Alteration	Alteration	Alteration	No alteration	No alteration	No alteration	Alteration	No alteration	No alteration	No alteration	No alteration	Alteration	No alteration	No alteration	No alteration	No alteration	No alteration	No alteration	No alteration	No alteration	Alteration	No alteration	Alteration	Alteration	No alteration	No alteration	No alteration	No alteration	No alteration	No alteration	No alteration	Alteration	No alteration	Alteration	Alteration	No alteration	No alteration	Alteration	Alteration	Alteration
1723725	F	33	Glioneuronal and neuronal tumors	2	Dead	3789	No alteration	No alteration	No alteration	Alteration	Alteration	Alteration	Alteration	Alteration	No alteration	Alteration	No alteration	No alteration	No alteration	No alteration	Alteration	No alteration	No alteration	No alteration	No alteration	No alteration	No alteration	No alteration	No alteration	Alteration	No alteration	Alteration	No alteration	No alteration	No alteration	No alteration	No alteration	Alteration	No alteration	No alteration	No alteration	No alteration	No alteration	Alteration	No alteration	No alteration	Alteration	Alteration	Alteration
1721304	M	32	Paediatric-type diffuse gliomas	4	Dead	3887	No alteration	No alteration	No alteration	No alteration	No alteration	No alteration	Alteration	Alteration	No alteration	No alteration	No alteration	No alteration	No alteration	No alteration	Alteration	No alteration	No alteration	No alteration	No alteration	No alteration	No alteration	No alteration	No alteration	No alteration	No alteration	No alteration	No alteration	Alteration	No alteration	No alteration	No alteration	Alteration	No alteration	Alteration	No alteration	No alteration	No alteration	Alteration	No alteration	No alteration	Alteration	No alteration	No alteration
1721207	F	46	Glioblastoma	4	Dead	3892	No alteration	No alteration	No alteration	Alteration	No alteration	Alteration	No alteration	Alteration	No alteration	Alteration	Alteration	No alteration	Alteration	No alteration	No alteration	No alteration	No alteration	No alteration	No alteration	No alteration	No alteration	Alteration	No alteration	Alteration	No alteration	Alteration	Alteration	No alteration	No alteration	No alteration	No alteration	Alteration	No alteration	No alteration	No alteration	No alteration	Alteration	Alteration	No alteration	No alteration	Alteration	Alteration	No alteration
1720216	F	33	Oligodendroglioma	2	Dead	3936	No alteration	No alteration	No alteration	Alteration	No alteration	No alteration	No alteration	No alteration	No alteration	No alteration	No alteration	Alteration	No alteration	No alteration	Alteration	No alteration	No alteration	No alteration	No alteration	Alteration	No alteration	No alteration	No alteration	No alteration	No alteration	No alteration	Alteration	Alteration	Alteration	Alteration	No alteration	Alteration	No alteration	No alteration	Alteration	Alteration	Alteration	No alteration	No alteration	No alteration	Alteration	No alteration	No alteration
1506025	F	39	Glioneuronal and neuronal tumors	1	Dead	2445	No alteration	No alteration	No alteration	No alteration	No alteration	No alteration	No alteration	No alteration	No alteration	No alteration	No alteration	No alteration	No alteration	No alteration	No alteration	No alteration	No alteration	No alteration	No alteration	No alteration	No alteration	No alteration	No alteration	No alteration	No alteration	No alteration	No alteration	No alteration	No alteration	No alteration	No alteration	No alteration	No alteration	No alteration	No alteration	No alteration	No alteration	Alteration	No alteration	No alteration	Alteration	No alteration	No alteration
1787718	F	22	Glioneuronal and neuronal tumors	1	Dead	1781	No alteration	No alteration	No alteration	No alteration	No alteration	No alteration	No alteration	No alteration	No alteration	Alteration	No alteration	Alteration	Alteration	Alteration	No alteration	No alteration	No alteration	No alteration	No alteration	No alteration	Alteration	Alteration	No alteration	No alteration	No alteration	No alteration	No alteration	No alteration	Alteration	Alteration	No alteration	Alteration	No alteration	No alteration	No alteration	Alteration	Alteration	No alteration	No alteration	No alteration	Alteration	Alteration	Alteration
2053674	F	70	Glioneuronal and neuronal tumors	1	Dead	2524	No alteration	No alteration	No alteration	No alteration	No alteration	No alteration	Alteration	Alteration	No alteration	No alteration	No alteration	No alteration	No alteration	No alteration	Alteration	No alteration	No alteration	No alteration	No alteration	No alteration	No alteration	No alteration	No alteration	No alteration	No alteration	No alteration	No alteration	Alteration	No alteration	No alteration	No alteration	Alteration	No alteration	Alteration	No alteration	No alteration	No alteration	Alteration	No alteration	No alteration	Alteration	No alteration	No alteration
2060957	F	19	Circumscribed astrocytic gliomas	1	Dead	2446	No alteration	No alteration	No alteration	No alteration	No alteration	No alteration	No alteration	Alteration	Alteration	No alteration	No alteration	No alteration	No alteration	No alteration	No alteration	No alteration	No alteration	No alteration	No alteration	Alteration	No alteration	No alteration	No alteration	Alteration	No alteration	No alteration	No alteration	No alteration	No alteration	No alteration	No alteration	No alteration	No alteration	No alteration	No alteration	Alteration	Alteration	Alteration	No alteration	No alteration	Alteration	Alteration	No alteration
2071384	F	35	Oligodendroglioma	2	Dead	2333	No alteration	No alteration	No alteration	Alteration	No alteration	No alteration	No alteration	No alteration	No alteration	No alteration	No alteration	Alteration	No alteration	No alteration	No alteration	No alteration	No alteration	No alteration	No alteration	No alteration	No alteration	No alteration	No alteration	Alteration	No alteration	No alteration	No alteration	Alteration	No alteration	No alteration	No alteration	No alteration	No alteration	No alteration	No alteration	No alteration	No alteration	Alteration	No alteration	No alteration	Alteration	Alteration	No alteration
1616808	F	51	Oligodendroglioma	3	Dead	683	No alteration	No alteration	No alteration	No alteration	No alteration	No alteration	Alteration	No alteration	Alteration	No alteration	No alteration	No alteration	No alteration	No alteration	No alteration	No alteration	No alteration	No alteration	No alteration	No alteration	No alteration	No alteration	No alteration	No alteration	No alteration	No alteration	No alteration	No alteration	No alteration	No alteration	No alteration	No alteration	No alteration	No alteration	No alteration	Alteration	Alteration	No alteration	No alteration	No alteration	Alteration	No alteration	No alteration
1766011	F	38	Circumscribed astrocytic gliomas	3	Dead	2052	No alteration	No alteration	No alteration	Alteration	No alteration	Alteration	No alteration	No alteration	No alteration	Alteration	No alteration	Alteration	Alteration	Alteration	Alteration	No alteration	No alteration	No alteration	No alteration	No alteration	No alteration	No alteration	No alteration	No alteration	No alteration	No alteration	No alteration	No alteration	Alteration	No alteration	No alteration	No alteration	No alteration	No alteration	Alteration	No alteration	No alteration	Alteration	No alteration	No alteration	Alteration	Alteration	No alteration
1853075	F	26	Oligodendroglioma	3	Dead	1409	No alteration	No alteration	No alteration	Alteration	No alteration	Alteration	Alteration	Alteration	No alteration	Alteration	No alteration	Alteration	Alteration	No alteration	No alteration	No alteration	No alteration	No alteration	No alteration	No alteration	No alteration	No alteration	No alteration	No alteration	No alteration	Alteration	Alteration	No alteration	Alteration	No alteration	No alteration	No alteration	No alteration	Alteration	Alteration	Alteration	Alteration	No alteration	No alteration	No alteration	Alteration	Alteration	No alteration
2057295	F	36	Oligodendroglioma	3	Dead	2496	No alteration	No alteration	No alteration	Alteration	Alteration	Alteration	No alteration	No alteration	No alteration	Alteration	No alteration	No alteration	No alteration	No alteration	Alteration	No alteration	No alteration	No alteration	No alteration	No alteration	No alteration	No alteration	No alteration	Alteration	No alteration	Alteration	Alteration	No alteration	No alteration	No alteration	No alteration	No alteration	No alteration	No alteration	Alteration	No alteration	Alteration	Alteration	No alteration	No alteration	Alteration	Alteration	Alteration
1647337	F	77	Glioblastoma	4	Dead	301	No alteration	No alteration	No alteration	No alteration	No alteration	Alteration	Alteration	Alteration	No alteration	Alteration	No alteration	No alteration	Alteration	No alteration	No alteration	No alteration	No alteration	No alteration	No alteration	No alteration	No alteration	Alteration	Alteration	No alteration	No alteration	Alteration	No alteration	No alteration	No alteration	No alteration	No alteration	No alteration	No alteration	No alteration	No alteration	Alteration	No alteration	Alteration	No alteration	No alteration	Alteration	Alteration	No alteration
1728627	F	55	Glioblastoma	4	Dead	330	No alteration	Alteration	No alteration	No alteration	Alteration	Alteration	Alteration	Alteration	Alteration	Alteration	No alteration	Alteration	Alteration	Alteration	Alteration	No alteration	No alteration	No alteration	No alteration	No alteration	No alteration	Alteration	No alteration	Alteration	No alteration	No alteration	Alteration	Alteration	Alteration	Alteration	Alteration	Alteration	No alteration	Alteration	Alteration	Alteration	Alteration	Alteration	Alteration	No alteration	Alteration	Alteration	Alteration
1734759	F	44	Glioblastoma	4	Dead	131	No alteration	Alteration	No alteration	Alteration	No alteration	Alteration	Alteration	Alteration	No alteration	Alteration	No alteration	No alteration	No alteration	Alteration	Alteration	No alteration	No alteration	No alteration	No alteration	No alteration	No alteration	No alteration	No alteration	No alteration	No alteration	Alteration	No alteration	No alteration	No alteration	No alteration	No alteration	No alteration	No alteration	No alteration	No alteration	Alteration	Alteration	Alteration	No alteration	No alteration	Alteration	No alteration	No alteration
1747596	F	43	Glioblastoma	4	Dead	345	No alteration	No alteration	Alteration	Alteration	Alteration	Alteration	Alteration	Alteration	No alteration	Alteration	No alteration	Alteration	Alteration	Alteration	No alteration	No alteration	No alteration	No alteration	No alteration	No alteration	No alteration	Alteration	No alteration	Alteration	No alteration	No alteration	No alteration	Alteration	No alteration	No alteration	Alteration	No alteration	No alteration	Alteration	Alteration	Alteration	No alteration	Alteration	No alteration	No alteration	Alteration	Alteration	Alteration
1771368	F	63	Glioblastoma	4	Dead	593	No alteration	No alteration	Alteration	No alteration	Alteration	Alteration	Alteration	Alteration	No alteration	No alteration	No alteration	No alteration	No alteration	No alteration	No alteration	No alteration	No alteration	No alteration	No alteration	No alteration	No alteration	No alteration	Alteration	Alteration	No alteration	No alteration	No alteration	No alteration	No alteration	Alteration	No alteration	Alteration	No alteration	No alteration	No alteration	Alteration	No alteration	Alteration	No alteration	No alteration	Alteration	Alteration	Alteration
1798964	F	15	Glioblastoma	4	Dead	111	No alteration	No alteration	No alteration	No alteration	Alteration	Alteration	Alteration	Alteration	Alteration	No alteration	No alteration	Alteration	Alteration	Alteration	No alteration	No alteration	No alteration	No alteration	No alteration	No alteration	No alteration	Alteration	No alteration	No alteration	No alteration	No alteration	Alteration	No alteration	No alteration	No alteration	Alteration	No alteration	No alteration	Alteration	Alteration	No alteration	No alteration	No alteration	No alteration	Alteration	No alteration	Alteration	No alteration
1799489	F	55	Glioblastoma	4	Dead	1769	No alteration	Alteration	No alteration	Alteration	Alteration	Alteration	Alteration	Alteration	No alteration	Alteration	No alteration	No alteration	No alteration	No alteration	No alteration	No alteration	No alteration	No alteration	No alteration	Alteration	No alteration	No alteration	No alteration	No alteration	No alteration	Alteration	No alteration	No alteration	No alteration	No alteration	No alteration	No alteration	Alteration	No alteration	No alteration	No alteration	No alteration	No alteration	No alteration	No alteration	Alteration	Alteration	No alteration
1880503	F	46	Glioblastoma	4	Dead	653	No alteration	No alteration	No alteration	No alteration	Alteration	No alteration	Alteration	Alteration	No alteration	No alteration	Alteration	No alteration	No alteration	No alteration	No alteration	No alteration	No alteration	No alteration	No alteration	Alteration	No alteration	No alteration	No alteration	No alteration	No alteration	No alteration	No alteration	No alteration	No alteration	No alteration	No alteration	Alteration	No alteration	Alteration	No alteration	No alteration	Alteration	No alteration	No alteration	No alteration	Alteration	No alteration	No alteration
2018117	F	69	Glioblastoma	4	Dead	427	No alteration	No alteration	No alteration	Alteration	No alteration	Alteration	No alteration	Alteration	No alteration	Alteration	No alteration	No alteration	Alteration	No alteration	No alteration	No alteration	No alteration	No alteration	No alteration	No alteration	No alteration	No alteration	No alteration	No alteration	No alteration	Alteration	No alteration	No alteration	No alteration	Alteration	No alteration	No alteration	No alteration	No alteration	No alteration	No alteration	Alteration	Alteration	No alteration	No alteration	Alteration	Alteration	No alteration
2021127	F	77	Glioblastoma	4	Dead	793	No alteration	No alteration	No alteration	Alteration	Alteration	Alteration	No alteration	Alteration	No alteration	No alteration	No alteration	No alteration	Alteration	No alteration	No alteration	Alteration	No alteration	No alteration	No alteration	Alteration	No alteration	Alteration	No alteration	No alteration	No alteration	Alteration	Alteration	No alteration	No alteration	No alteration	Alteration	No alteration	No alteration	No alteration	Alteration	No alteration	Alteration	No alteration	No alteration	No alteration	Alteration	No alteration	No alteration
2022429	F	50	Glioblastoma	4	Dead	657	No alteration	No alteration	No alteration	Alteration	Alteration	Alteration	Alteration	Alteration	No alteration	Alteration	No alteration	No alteration	Alteration	Alteration	No alteration	No alteration	No alteration	No alteration	No alteration	No alteration	No alteration	No alteration	No alteration	No alteration	No alteration	Alteration	No alteration	No alteration	No alteration	No alteration	No alteration	No alteration	No alteration	No alteration	No alteration	No alteration	Alteration	Alteration	No alteration	No alteration	Alteration	Alteration	No alteration
2028777	F	59	Glioblastoma	4	Dead	270	No alteration	No alteration	No alteration	Alteration	Alteration	Alteration	Alteration	Alteration	No alteration	Alteration	No alteration	Alteration	Alteration	Alteration	Alteration	No alteration	No alteration	No alteration	No alteration	No alteration	No alteration	No alteration	No alteration	Alteration	No alteration	Alteration	Alteration	Alteration	No alteration	No alteration	No alteration	No alteration	No alteration	Alteration	Alteration	Alteration	Alteration	Alteration	No alteration	No alteration	Alteration	Alteration	No alteration
2037027	F	59	Glioblastoma	4	Dead	767	No alteration	Alteration	No alteration	No alteration	Alteration	Alteration	Alteration	Alteration	No alteration	Alteration	No alteration	Alteration	Alteration	Alteration	Alteration	No alteration	No alteration	No alteration	No alteration	No alteration	No alteration	No alteration	No alteration	No alteration	No alteration	No alteration	No alteration	No alteration	No alteration	Alteration	Alteration	No alteration	No alteration	Alteration	Alteration	No alteration	Alteration	Alteration	No alteration	No alteration	Alteration	Alteration	Alteration
2049777	F	47	Glioblastoma	4	Dead	474	No alteration	No alteration	No alteration	Alteration	No alteration	Alteration	No alteration	No alteration	No alteration	Alteration	No alteration	Alteration	No alteration	Alteration	Alteration	No alteration	No alteration	No alteration	No alteration	No alteration	No alteration	Alteration	No alteration	Alteration	No alteration	No alteration	Alteration	Alteration	Alteration	No alteration	No alteration	No alteration	No alteration	Alteration	No alteration	No alteration	Alteration	Alteration	No alteration	No alteration	Alteration	No alteration	No alteration
2060698	F	63	Glioblastoma	4	Dead	248	No alteration	No alteration	No alteration	No alteration	Alteration	Alteration	Alteration	Alteration	No alteration	Alteration	No alteration	No alteration	No alteration	Alteration	No alteration	No alteration	No alteration	No alteration	No alteration	No alteration	No alteration	No alteration	No alteration	No alteration	No alteration	Alteration	Alteration	No alteration	Alteration	No alteration	No alteration	Alteration	No alteration	Alteration	Alteration	No alteration	No alteration	Alteration	No alteration	No alteration	Alteration	No alteration	No alteration
2064573	F	43	Glioblastoma	4	Dead	1261	No alteration	Alteration	No alteration	No alteration	No alteration	No alteration	No alteration	No alteration	No alteration	No alteration	No alteration	No alteration	No alteration	No alteration	No alteration	No alteration	No alteration	No alteration	No alteration	Alteration	No alteration	Alteration	No alteration	Alteration	No alteration	Alteration	No alteration	No alteration	Alteration	No alteration	No alteration	No alteration	No alteration	No alteration	No alteration	Alteration	No alteration	Alteration	Alteration	No alteration	Alteration	No alteration	No alteration
2075130	F	52	Glioblastoma	4	Dead	324	No alteration	No alteration	No alteration	Alteration	No alteration	Alteration	Alteration	Alteration	No alteration	Alteration	No alteration	No alteration	Alteration	No alteration	No alteration	No alteration	No alteration	No alteration	No alteration	No alteration	No alteration	No alteration	No alteration	No alteration	No alteration	Alteration	Alteration	No alteration	No alteration	No alteration	No alteration	No alteration	No alteration	No alteration	No alteration	No alteration	No alteration	No alteration	No alteration	No alteration	Alteration	Alteration	No alteration
2075999	F	61	Glioblastoma	4	Dead	343	No alteration	No alteration	No alteration	No alteration	Alteration	Alteration	Alteration	Alteration	No alteration	Alteration	No alteration	No alteration	Alteration	No alteration	No alteration	No alteration	No alteration	No alteration	No alteration	No alteration	No alteration	No alteration	No alteration	Alteration	No alteration	No alteration	Alteration	No alteration	No alteration	No alteration	No alteration	No alteration	No alteration	No alteration	No alteration	No alteration	Alteration	No alteration	No alteration	Alteration	No alteration	Alteration	No alteration
2081593	F	57	Glioblastoma	4	Dead	283	No alteration	No alteration	No alteration	No alteration	No alteration	No alteration	Alteration	Alteration	No alteration	Alteration	No alteration	No alteration	Alteration	No alteration	No alteration	No alteration	No alteration	No alteration	No alteration	No alteration	No alteration	No alteration	No alteration	No alteration	No alteration	No alteration	Alteration	No alteration	No alteration	No alteration	No alteration	Alteration	No alteration	Alteration	No alteration	No alteration	No alteration	No alteration	No alteration	No alteration	Alteration	Alteration	No alteration
2085311	F	73	Glioblastoma	4	Dead	774	No alteration	Alteration	No alteration	No alteration	No alteration	Alteration	No alteration	No alteration	No alteration	No alteration	No alteration	Alteration	Alteration	Alteration	Alteration	No alteration	No alteration	No alteration	No alteration	Alteration	No alteration	No alteration	No alteration	No alteration	No alteration	No alteration	No alteration	No alteration	No alteration	Alteration	No alteration	No alteration	No alteration	Alteration	No alteration	No alteration	No alteration	No alteration	No alteration	No alteration	Alteration	Alteration	No alteration
2086748	F	63	Glioblastoma	4	Dead	424	No alteration	No alteration	No alteration	Alteration	No alteration	Alteration	Alteration	Alteration	No alteration	Alteration	No alteration	Alteration	Alteration	Alteration	No alteration	No alteration	No alteration	No alteration	No alteration	No alteration	No alteration	Alteration	No alteration	Alteration	No alteration	No alteration	Alteration	Alteration	Alteration	No alteration	No alteration	No alteration	No alteration	No alteration	Alteration	Alteration	No alteration	Alteration	No alteration	No alteration	Alteration	Alteration	Alteration
2090726	F	48	Glioblastoma	4	Dead	254	No alteration	No alteration	No alteration	No alteration	Alteration	Alteration	Alteration	Alteration	Alteration	Alteration	No alteration	Alteration	Alteration	Alteration	Alteration	No alteration	No alteration	No alteration	No alteration	No alteration	No alteration	Alteration	No alteration	Alteration	No alteration	No alteration	Alteration	No alteration	Alteration	No alteration	No alteration	No alteration	No alteration	Alteration	Alteration	Alteration	Alteration	Alteration	No alteration	No alteration	Alteration	Alteration	No alteration
1525429	M	12	Glioneuronal and neuronal tumors	1	Dead	2601	No alteration	No alteration	No alteration	Alteration	No alteration	No alteration	No alteration	No alteration	No alteration	No alteration	No alteration	Alteration	No alteration	No alteration	Alteration	No alteration	No alteration	No alteration	No alteration	Alteration	No alteration	No alteration	No alteration	No alteration	No alteration	No alteration	Alteration	Alteration	Alteration	Alteration	No alteration	Alteration	No alteration	No alteration	Alteration	Alteration	Alteration	No alteration	No alteration	No alteration	Alteration	No alteration	No alteration
2059261	M	46	Glioneuronal and neuronal tumors	1	Dead	2272	No alteration	No alteration	No alteration	Alteration	Alteration	No alteration	No alteration	No alteration	No alteration	No alteration	No alteration	No alteration	Alteration	Alteration	No alteration	No alteration	No alteration	No alteration	No alteration	Alteration	No alteration	No alteration	No alteration	Alteration	No alteration	Alteration	No alteration	No alteration	No alteration	No alteration	No alteration	Alteration	No alteration	Alteration	No alteration	No alteration	No alteration	Alteration	No alteration	No alteration	Alteration	Alteration	No alteration
2061853	M	17	Glioneuronal and neuronal tumors	1	Dead	2417	No alteration	No alteration	No alteration	Alteration	No alteration	Alteration	No alteration	Alteration	No alteration	Alteration	No alteration	No alteration	No alteration	No alteration	No alteration	No alteration	No alteration	No alteration	No alteration	Alteration	No alteration	No alteration	No alteration	No alteration	No alteration	Alteration	No alteration	No alteration	Alteration	No alteration	No alteration	No alteration	No alteration	No alteration	No alteration	No alteration	Alteration	Alteration	No alteration	No alteration	Alteration	No alteration	No alteration
1727963	M	43	Oligodendroglioma	2	Dead	1590	No alteration	Alteration	No alteration	Alteration	Alteration	No alteration	No alteration	No alteration	No alteration	No alteration	No alteration	No alteration	No alteration	No alteration	No alteration	No alteration	No alteration	No alteration	No alteration	Alteration	No alteration	No alteration	No alteration	No alteration	No alteration	No alteration	No alteration	No alteration	Alteration	No alteration	No alteration	Alteration	No alteration	Alteration	No alteration	No alteration	Alteration	Alteration	No alteration	No alteration	Alteration	Alteration	No alteration
1807597	M	60	Oligodendroglioma	2	Dead	2571	No alteration	No alteration	No alteration	Alteration	No alteration	Alteration	No alteration	Alteration	No alteration	Alteration	Alteration	No alteration	Alteration	No alteration	No alteration	No alteration	No alteration	No alteration	No alteration	No alteration	No alteration	Alteration	No alteration	Alteration	No alteration	Alteration	Alteration	No alteration	No alteration	No alteration	No alteration	Alteration	No alteration	No alteration	No alteration	No alteration	Alteration	Alteration	No alteration	No alteration	Alteration	Alteration	No alteration
1851175	M	45	Oligodendroglioma	2	Dead	2482	No alteration	No alteration	No alteration	No alteration	No alteration	No alteration	No alteration	No alteration	No alteration	No alteration	No alteration	No alteration	No alteration	No alteration	No alteration	No alteration	No alteration	No alteration	No alteration	No alteration	No alteration	No alteration	No alteration	No alteration	No alteration	No alteration	No alteration	No alteration	No alteration	No alteration	No alteration	No alteration	No alteration	No alteration	No alteration	No alteration	No alteration	No alteration	No alteration	No alteration	Alteration	No alteration	No alteration
2063084	M	37	Oligodendroglioma	2	Dead	2440	No alteration	No alteration	No alteration	Alteration	No alteration	No alteration	No alteration	No alteration	No alteration	Alteration	No alteration	No alteration	Alteration	No alteration	No alteration	No alteration	No alteration	No alteration	No alteration	Alteration	No alteration	Alteration	No alteration	Alteration	No alteration	Alteration	Alteration	No alteration	No alteration	No alteration	No alteration	No alteration	No alteration	No alteration	Alteration	Alteration	Alteration	No alteration	No alteration	No alteration	Alteration	Alteration	Alteration
2091347	M	51	Oligodendroglioma	2	Dead	2130	No alteration	No alteration	No alteration	No alteration	No alteration	No alteration	No alteration	Alteration	No alteration	No alteration	No alteration	No alteration	No alteration	No alteration	No alteration	No alteration	No alteration	No alteration	No alteration	No alteration	No alteration	No alteration	Alteration	No alteration	No alteration	No alteration	Alteration	No alteration	No alteration	No alteration	No alteration	No alteration	No alteration	No alteration	No alteration	Alteration	No alteration	Alteration	No alteration	No alteration	Alteration	Alteration	No alteration
2012528	M	48	Oligodendroglioma	3	Dead	2342	No alteration	No alteration	No alteration	No alteration	No alteration	No alteration	No alteration	No alteration	No alteration	No alteration	No alteration	No alteration	No alteration	No alteration	No alteration	No alteration	No alteration	No alteration	No alteration	Alteration	No alteration	No alteration	No alteration	No alteration	No alteration	No alteration	No alteration	No alteration	No alteration	No alteration	No alteration	No alteration	No alteration	No alteration	No alteration	No alteration	Alteration	No alteration	No alteration	No alteration	Alteration	No alteration	No alteration
2042416	M	28	Glioneuronal and neuronal tumors	3	Dead	287	No alteration	No alteration	No alteration	No alteration	No alteration	Alteration	Alteration	Alteration	No alteration	Alteration	No alteration	No alteration	Alteration	No alteration	No alteration	No alteration	No alteration	No alteration	No alteration	No alteration	No alteration	No alteration	No alteration	No alteration	No alteration	Alteration	No alteration	No alteration	No alteration	No alteration	No alteration	No alteration	No alteration	No alteration	No alteration	No alteration	Alteration	Alteration	No alteration	No alteration	Alteration	Alteration	No alteration
2074483	M	52	Oligodendroglioma	3	Dead	273	No alteration	No alteration	No alteration	No alteration	No alteration	Alteration	Alteration	Alteration	Alteration	Alteration	No alteration	No alteration	Alteration	No alteration	No alteration	No alteration	No alteration	No alteration	No alteration	No alteration	No alteration	No alteration	Alteration	No alteration	No alteration	Alteration	Alteration	Alteration	No alteration	No alteration	No alteration	Alteration	No alteration	Alteration	No alteration	No alteration	Alteration	No alteration	No alteration	No alteration	Alteration	Alteration	No alteration
1651350	M	37	Astrocytoma	4	Dead	326	No alteration	No alteration	No alteration	Alteration	Alteration	Alteration	Alteration	Alteration	No alteration	Alteration	No alteration	No alteration	Alteration	Alteration	Alteration	No alteration	No alteration	No alteration	No alteration	No alteration	No alteration	Alteration	No alteration	Alteration	No alteration	Alteration	Alteration	Alteration	No alteration	Alteration	No alteration	No alteration	No alteration	Alteration	Alteration	Alteration	Alteration	Alteration	No alteration	No alteration	Alteration	Alteration	No alteration
1724790	M	76	Glioblastoma	4	Dead	338	No alteration	Alteration	No alteration	Alteration	Alteration	Alteration	Alteration	Alteration	No alteration	Alteration	Alteration	Alteration	Alteration	No alteration	Alteration	No alteration	No alteration	No alteration	No alteration	Alteration	No alteration	No alteration	No alteration	Alteration	No alteration	No alteration	No alteration	No alteration	Alteration	No alteration	No alteration	Alteration	No alteration	No alteration	No alteration	No alteration	No alteration	Alteration	No alteration	Alteration	No alteration	Alteration	No alteration
1870762	M	76	Glioblastoma	4	Dead	183	No alteration	No alteration	No alteration	Alteration	Alteration	Alteration	Alteration	Alteration	No alteration	Alteration	No alteration	Alteration	Alteration	Alteration	No alteration	No alteration	No alteration	No alteration	No alteration	No alteration	No alteration	Alteration	No alteration	Alteration	No alteration	No alteration	Alteration	Alteration	Alteration	No alteration	No alteration	No alteration	No alteration	Alteration	Alteration	Alteration	Alteration	Alteration	No alteration	No alteration	Alteration	Alteration	Alteration
2004670	M	49	Astrocytoma	4	Dead	953	No alteration	No alteration	No alteration	Alteration	Alteration	Alteration	Alteration	Alteration	No alteration	Alteration	No alteration	Alteration	No alteration	Alteration	No alteration	Alteration	No alteration	No alteration	No alteration	Alteration	No alteration	Alteration	No alteration	Alteration	No alteration	Alteration	Alteration	Alteration	No alteration	Alteration	No alteration	No alteration	No alteration	Alteration	Alteration	Alteration	Alteration	Alteration	No alteration	No alteration	Alteration	Alteration	No alteration
2012860	M	56	Glioblastoma	4	Dead	327	No alteration	No alteration	No alteration	No alteration	No alteration	No alteration	Alteration	Alteration	No alteration	Alteration	No alteration	No alteration	Alteration	No alteration	No alteration	No alteration	No alteration	No alteration	No alteration	No alteration	No alteration	No alteration	No alteration	No alteration	No alteration	No alteration	No alteration	No alteration	No alteration	No alteration	No alteration	No alteration	No alteration	No alteration	No alteration	Alteration	No alteration	No alteration	No alteration	No alteration	Alteration	No alteration	Alteration
2015550	M	50	Astrocytoma	4	Dead	752	No alteration	No alteration	No alteration	Alteration	Alteration	Alteration	No alteration	No alteration	Alteration	No alteration	No alteration	Alteration	No alteration	No alteration	Alteration	Alteration	No alteration	No alteration	No alteration	Alteration	No alteration	Alteration	Alteration	Alteration	No alteration	No alteration	No alteration	Alteration	Alteration	Alteration	No alteration	No alteration	No alteration	Alteration	Alteration	Alteration	Alteration	Alteration	No alteration	No alteration	Alteration	Alteration	No alteration
2018702	M	19	Glioblastoma	4	Dead	1143	No alteration	Alteration	No alteration	Alteration	Alteration	No alteration	No alteration	No alteration	Alteration	Alteration	No alteration	Alteration	No alteration	No alteration	No alteration	No alteration	No alteration	No alteration	No alteration	Alteration	No alteration	No alteration	No alteration	Alteration	No alteration	Alteration	Alteration	Alteration	Alteration	No alteration	No alteration	No alteration	No alteration	Alteration	No alteration	Alteration	No alteration	Alteration	No alteration	No alteration	Alteration	Alteration	Alteration
2030887	M	64	Glioblastoma	4	Dead	509	No alteration	No alteration	No alteration	No alteration	Alteration	No alteration	Alteration	No alteration	No alteration	No alteration	No alteration	Alteration	No alteration	No alteration	Alteration	No alteration	No alteration	No alteration	No alteration	No alteration	No alteration	Alteration	No alteration	No alteration	No alteration	No alteration	Alteration	No alteration	No alteration	No alteration	No alteration	No alteration	No alteration	Alteration	No alteration	Alteration	No alteration	No alteration	No alteration	No alteration	Alteration	Alteration	Alteration
2038572	M	73	Glioblastoma	4	Dead	118	No alteration	No alteration	No alteration	Alteration	No alteration	Alteration	Alteration	Alteration	Alteration	Alteration	No alteration	No alteration	Alteration	No alteration	No alteration	No alteration	No alteration	No alteration	No alteration	No alteration	No alteration	No alteration	No alteration	No alteration	No alteration	Alteration	No alteration	No alteration	No alteration	No alteration	No alteration	No alteration	No alteration	No alteration	No alteration	No alteration	No alteration	No alteration	No alteration	No alteration	Alteration	Alteration	No alteration
2042167	M	55	Glioblastoma	4	Dead	184	No alteration	No alteration	No alteration	Alteration	No alteration	Alteration	Alteration	Alteration	No alteration	Alteration	No alteration	Alteration	Alteration	No alteration	Alteration	No alteration	No alteration	No alteration	No alteration	No alteration	No alteration	No alteration	No alteration	No alteration	No alteration	Alteration	Alteration	Alteration	No alteration	No alteration	No alteration	Alteration	No alteration	No alteration	No alteration	No alteration	Alteration	No alteration	No alteration	No alteration	Alteration	Alteration	No alteration
2044444	M	24	Glioblastoma	4	Dead	983	No alteration	No alteration	No alteration	Alteration	No alteration	No alteration	Alteration	Alteration	No alteration	No alteration	No alteration	No alteration	No alteration	No alteration	No alteration	No alteration	No alteration	No alteration	No alteration	No alteration	No alteration	No alteration	No alteration	No alteration	No alteration	No alteration	No alteration	No alteration	No alteration	No alteration	No alteration	Alteration	No alteration	Alteration	No alteration	No alteration	No alteration	Alteration	No alteration	No alteration	Alteration	No alteration	No alteration
2057952	M	38	Astrocytoma	4	Dead	2509	No alteration	No alteration	No alteration	Alteration	Alteration	Alteration	Alteration	Alteration	No alteration	Alteration	No alteration	No alteration	No alteration	No alteration	Alteration	No alteration	No alteration	No alteration	No alteration	No alteration	No alteration	No alteration	No alteration	Alteration	No alteration	Alteration	No alteration	No alteration	No alteration	No alteration	No alteration	Alteration	No alteration	No alteration	No alteration	No alteration	No alteration	Alteration	No alteration	No alteration	Alteration	Alteration	Alteration
2063642	M	43	Glioblastoma	4	Dead	132	No alteration	No alteration	No alteration	Alteration	No alteration	Alteration	No alteration	No alteration	No alteration	Alteration	No alteration	No alteration	No alteration	No alteration	No alteration	No alteration	No alteration	No alteration	No alteration	No alteration	No alteration	Alteration	Alteration	No alteration	No alteration	No alteration	No alteration	No alteration	No alteration	No alteration	No alteration	No alteration	No alteration	No alteration	No alteration	No alteration	No alteration	No alteration	No alteration	No alteration	Alteration	No alteration	No alteration
2080793	M	71	Glioblastoma	4	Dead	371	No alteration	Alteration	No alteration	No alteration	Alteration	Alteration	Alteration	No alteration	No alteration	No alteration	No alteration	Alteration	No alteration	Alteration	No alteration	No alteration	No alteration	No alteration	No alteration	Alteration	No alteration	Alteration	No alteration	No alteration	No alteration	No alteration	No alteration	No alteration	No alteration	No alteration	No alteration	Alteration	No alteration	Alteration	No alteration	No alteration	Alteration	No alteration	No alteration	No alteration	Alteration	No alteration	No alteration
2082285	M	52	Glioblastoma	4	Dead	202	No alteration	No alteration	No alteration	Alteration	Alteration	Alteration	Alteration	Alteration	No alteration	Alteration	No alteration	Alteration	Alteration	No alteration	No alteration	No alteration	No alteration	No alteration	No alteration	No alteration	No alteration	No alteration	No alteration	Alteration	No alteration	No alteration	No alteration	Alteration	No alteration	Alteration	No alteration	No alteration	No alteration	No alteration	No alteration	Alteration	No alteration	No alteration	No alteration	No alteration	Alteration	Alteration	No alteration
2082637	M	64	Glioblastoma	4	Dead	1224	No alteration	Alteration	No alteration	Alteration	Alteration	No alteration	No alteration	Alteration	No alteration	No alteration	No alteration	No alteration	No alteration	No alteration	No alteration	No alteration	No alteration	No alteration	No alteration	Alteration	No alteration	No alteration	Alteration	Alteration	No alteration	No alteration	No alteration	No alteration	Alteration	No alteration	No alteration	Alteration	No alteration	Alteration	No alteration	No alteration	No alteration	Alteration	No alteration	No alteration	Alteration	Alteration	No alteration
2089905	M	75	Glioblastoma	4	Dead	322	No alteration	Alteration	No alteration	No alteration	Alteration	No alteration	No alteration	No alteration	No alteration	No alteration	No alteration	No alteration	No alteration	No alteration	Alteration	No alteration	No alteration	No alteration	No alteration	Alteration	No alteration	Alteration	No alteration	No alteration	No alteration	No alteration	No alteration	No alteration	No alteration	No alteration	No alteration	No alteration	No alteration	No alteration	No alteration	Alteration	No alteration	Alteration	No alteration	No alteration	Alteration	No alteration	Alteration
[truncated: 17 more columns]
