# Supplementary material for: An online survival predictor in glioma patients using machine learning based on WHO CNS5 data
Source: Front Neurol. 2023 May 19;14:1179761. doi: 10.3389/fneur.2023.1179761 (PMC10237015; doi:10.3389/fneur.2023.1179761)
Supplement: Supplementary file 4 [file Table_2.XLSX]

## Sheet: Sheet1
Table 2. Univariate and Multivariable Cox regression analysis of HGG and LGG group.
	HGG group								LGG group
	Univariate Cox regression				Multivariable Cox regression				Univariate Cox regression				Multivariable Cox regression
Variable	HR	HR.95L	HR.95H	pvalue	HR	HR.95L	HR.95H	pvalue	HR	HR.95L	HR.95H	pvalue	HR	HR.95L	HR.95H	pvalue
Sex	1.73006	1.08626	2.75541	0.0209757	1.70823	0.91922	3.17449	0.0903487	1.42892	0.741321	2.75429	0.286426	1.04404	0.138446	7.87321	0.966651
Age	1.03255	1.01562	1.04976	<0.01	1.03323	1.0083	1.05878	0.00870097	1.0218	0.997424	1.04677	0.0800132	1.18328	1.07912	1.29749	<0.01
BRAF	0.922393	0.605844	1.40434	0.706417	1.36328	0.689922	2.69385	0.372496	1.39516	0.759287	2.56356	0.283352	0.440781	0.0220854	8.79709	0.59172
CDK4	0.455413	0.290059	0.71503	<0.01	0.522991	0.254946	1.07285	0.0770374	0.76922	0.424376	1.39428	0.387234	0.673296	0.0655932	6.91119	0.739186
CDK6	0.478569	0.299805	0.763923	<0.01	0.674557	0.258281	1.76175	0.421523	1.1278	0.599102	2.12308	0.709418	1.88682	0.397711	8.9514	0.424147
CDKN2A	0.544696	0.340841	0.870475	0.0110886	0.345333	0.12652	0.942573	0.037949	0.632975	0.322602	1.24195	0.183565	0.478187	0.0237416	9.63133	0.63013
CDKN2B	0.736158	0.450175	1.20382	0.222194	3.24193	1.13477	9.2619	0.0280905	1.14943	0.628544	2.10198	0.651126	0.0354953	0.00318794	0.395214	0.00662895
EGFR	0.492591	0.306074	0.792769	<0.01	0.410646	0.150873	1.11769	0.0814798	1.09712	0.584537	2.0592	0.772936	2.50388	0.425499	14.7342	0.310102
FGFR1	0.904699	0.589024	1.38955	0.647367	1.20708	0.539256	2.70196	0.6471	0.601019	0.3212	1.12461	0.111246	0.0163032	0.00154681	0.171834	<0.01
FGFR2	0.547264	0.359434	0.833246	<0.01	0.494739	0.22861	1.07068	0.0740034	0.558363	0.263629	1.18261	0.128025	0.00319684	0.000136084	0.075099	<0.01
FGFR3	0.567343	0.365546	0.880541	0.0114974	1.2205	0.585633	2.54359	0.594838	0.831288	0.364388	1.89644	0.66058	23.7577	1.18826	475.007	0.0381884
FGFR4	0.763791	0.475948	1.22572	0.264167	1.27682	0.614999	2.65086	0.512044	1.41847	0.717832	2.80297	0.314431	0.0516615	0.00387941	0.687968	0.0248903
IDH1	1.63312	1.02337	2.60617	0.039701	1.94528	0.910577	4.15575	0.0857804	0.76537	0.387851	1.51035	0.440699	28.9834	0.274121	3064.48	0.15685
KIT	0.9382	0.611265	1.43999	0.770413	0.906627	0.463538	1.77326	0.774579	0.168578	0.0716996	0.396355	<0.01	0.00178496	0.000107901	0.0295278	<0.01
KRAS	0.811461	0.536613	1.22708	0.322117	1.40229	0.666598	2.94994	0.372883	1.17335	0.634189	2.1709	0.610573	17.1173	0.664872	440.687	0.0865868
MET	0.888152	0.587781	1.34202	0.573312	1.43668	0.722993	2.85486	0.301051	1.73597	0.846865	3.55853	0.132041	5.66038	0.391989	81.7368	0.203197
MYB	0.640683	0.421667	0.973457	0.0369781	0.610226	0.31046	1.19943	0.151989	1.33135	0.6925	2.55954	0.390806	4.62311	0.31809	67.192	0.262209
MYBL1	0.894441	0.578539	1.38284	0.615782	0.969312	0.470726	1.99599	0.932599	0.780021	0.319587	1.90381	0.585272	0.0233026	0.000615067	0.882846	0.0426463
MYC	1.10773	0.71345	1.71991	0.648535	1.32906	0.625158	2.82553	0.459758	1.17779	0.604095	2.2963	0.630968	42.6285	0.929067	1955.93	0.0545712
MYCN	0.820344	0.495771	1.35741	0.440882	1.1836	0.47877	2.92604	0.715106	0.774822	0.336746	1.78279	0.548467	0.129719	0.00415965	4.04532	0.244553
NOTCH1	1.19359	0.768429	1.854	0.430914	1.75967	0.967436	3.20067	0.0640978	1.18397	0.639053	2.19355	0.591433	1.8175	0.421891	7.82973	0.42267
NTRK2	0.731134	0.481165	1.11096	0.14237	0.452452	0.231287	0.885102	0.0205329	0.584781	0.305746	1.11847	0.104897	0.578337	0.0282758	11.829	0.722135
NTRK3	0.775039	0.497536	1.20732	0.259796	1.04925	0.434921	2.5313	0.914799	1.24912	0.623508	2.50246	0.530362	57.5768	2.46024	1347.47	0.0117486
PDGFRA	0.970268	0.638237	1.47503	0.887684	1.20063	0.59736	2.41314	0.607695	1.076	0.560361	2.06611	0.825836	2.50059	0.421449	14.8368	0.313042
PEG3	0.817955	0.540518	1.23779	0.341761	1.04014	0.518382	2.08704	0.911809	1.02365	0.563308	1.86019	0.938861	0.0114466	0.000740362	0.176974	<0.01
PIK3CA	0.964812	0.621745	1.49718	0.873051	0.602083	0.292349	1.23997	0.168685	1.46227	0.79644	2.68475	0.220286	0.116605	0.0195659	0.694915	0.0182944
PTEN	0.625154	0.400002	0.977041	0.0392158	1.71361	0.800493	3.66831	0.165461	1.24402	0.685647	2.25711	0.472539	6.42692	1.15192	35.8579	0.0339042
PTPN11	0.792263	0.490133	1.28063	0.341904	0.764777	0.375158	1.55903	0.460537	1.34747	0.636562	2.85232	0.43571	0.0388334	0.000782039	1.92834	0.103019
RB1	0.889562	0.58771	1.34645	0.580016	0.70746	0.334504	1.49624	0.365169	0.710406	0.347055	1.45417	0.349531	21.2404	0.642096	702.631	0.0869331
TERT	0.616598	0.402887	0.943671	0.0259483	0.570802	0.270646	1.20384	0.140831	0.933897	0.51444	1.69536	0.822141	4.49933	0.0527002	384.134	0.50744
TOP3A	0.645308	0.419537	0.992577	0.0461653	1.58656	0.545331	4.61585	0.396933	1.14299	0.607739	2.14965	0.678367	48.5959	5.77667	408.811	<0.01
TP53	0.848608	0.538436	1.33746	0.479416	0.470044	0.214111	1.0319	0.0598775	0.526962	0.273597	1.01496	0.055419	0.0139356	0.000147498	1.31665	0.0655594
