# Supplementary material for: An online survival predictor in glioma patients using machine learning based on WHO CNS5 data
Source: Front Neurol. 2023 May 19;14:1179761. doi: 10.3389/fneur.2023.1179761 (PMC10237015; doi:10.3389/fneur.2023.1179761)
Supplement: Supplementary file 5 [file Table_3.XLSX]

## Sheet: Sheet1
Table 3. The coefficient of each factor.
WHO5 risk signature			Control signature
factors	Coef		factors	Coef
CDK4	0.389521		Grade	0.352818
KIT	0.236379		Age	0.0276726
CDK6	0.0554287
IDH1	-0.218138
CDKN2A	0.468628
FGFR2	0.356818
Age	0.0243117
Coef. Coefficient.
